# Supplementary material
Source: PubMed Central journal article supplement (PMC5806691)
Supplement: NIHMS75874-supplement-Supplemental.pdf [file NIHMS75874-supplement-Supplemental.pdf]

## Supplementary Figures, Tables, Text and References

### Supplementary Figure 1

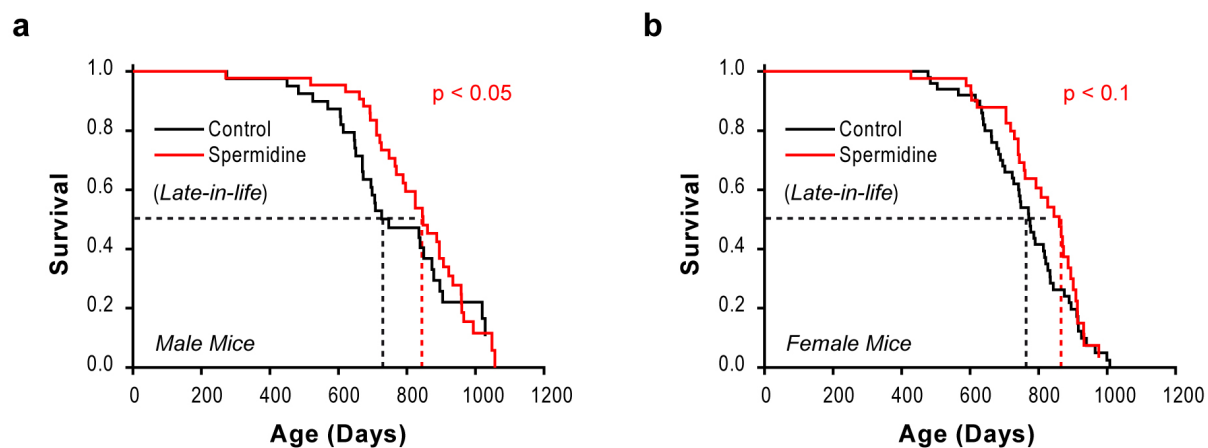

#### Supplementary Figure 1. Spermidine supplementation *late-in-life* shows comparable effects on longevity in male and female C57BL/6 mice.

Kaplan-Meier survival analysis of male (a) and female (b) aging C57BL/6J wild-type mice with *late-in-life* supplementation of spermidine (see Fig. 1a, d). Mice received standard chow and autoclaved water *ad libitum*. Dashed lines depict median lifespans. N=41/44 (a, control/spermidine) male mice and N=50/42 (b, control/spermidine) female mice. P-value represents comparison with control group calculated using Breslow test.

## Supplementary Figure 2

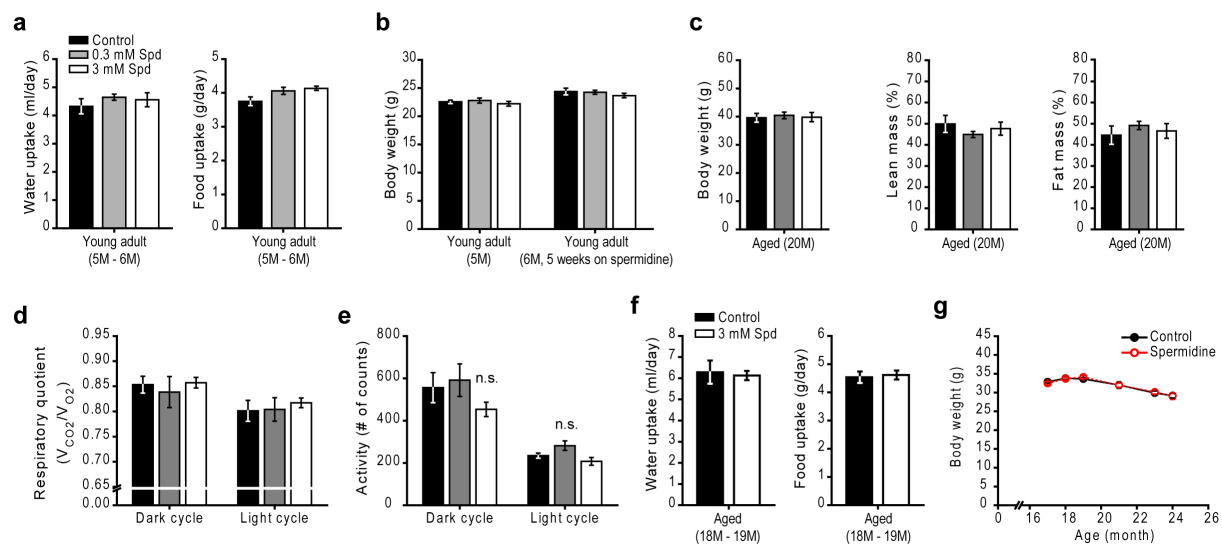

**Supplementary Figure 2. Food and water uptakes, body weight and body composition are not affected by spermidine supplementation in young and aged mice.**

Spermidine (Spd) was supplemented to drinking water either early-in-life, *life-long* or *late-in-life* (see Fig. 1a for the feeding scheme) (**a, b**) Food and water consumptions (a) as well as body weight (b), determined before (left) and after (right) the period of food and water consumption recordings of young wild-type C57BL/6N female mice with and without Spd supplementation in drinking water. Food and water consumptions were recorded and averaged over a period of 5 weeks (at indicated ages in months, M). N=4 cages/group with each cage containing 5 mice. (**c-e**) Body weight as well as body fat and lean mass percentages (c), respiratory quotient (d) and general activity (e) of aged (20M) wild-type C57BL/6N female mice after *life-long* supplementation of spermidine. N=12 (c) and N=11-12 (d, e) mice/group. (**f, g**) Food and water consumptions (f) as well as body weight (g) of *late-in-life* spermidine-supplemented aged wild-type C57BL/6J male mice compared with age-matched controls at the indicated ages. N=9 cages/group with each cage containing 4 mice (f), N=14-36 mice/group and time point (g). Data are presented as means  $\pm$  s.e.m..

### Supplementary Figure 3

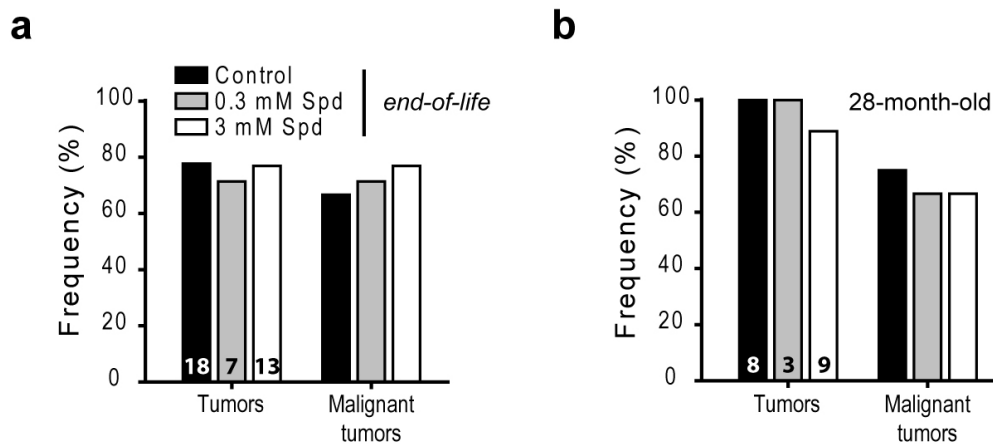

#### Supplementary Figure 3. Tumor incidence is not affected by spermidine treatment in aged mice.

Tumor incidence determined by pathological analyses of **(a)** “*end-of-life*” animals (sacrificed close before their natural death; see Methods section for the *end-of-life determination* criteria) and **(b)** 28-month-old mice after *life-long* supplementation of spermidine (Spd) to drinking water at indicated concentrations and compared to respective untreated controls (see Fig. 1a for the feeding scheme). Data show the relative fraction of tumor incidences (in %), which were not significantly different between the groups as tested by binomial logistic regression. Numbers in bars indicate the number of mice analyzed. Malignant tumors were defined according to “WHO International Classification of Rodent Tumors”, Ref.: *International Classification of Rodent Tumors. The Mouse*. (Mohr, Ulrich (Ed.), Springer Berlin Heidelberg, 2001).

## Supplementary Figure 4

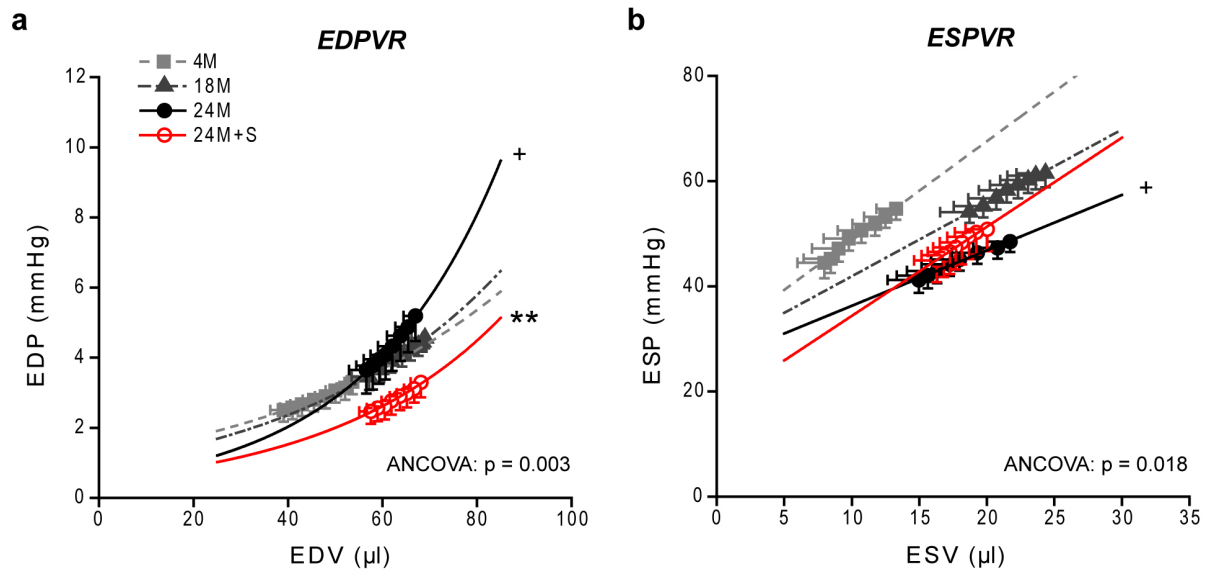

### Supplementary Figure 4. Spermidine improves cardiac diastolic function by reducing left ventricular passive stiffness in aging C57BL/6J mice.

Cardiac function was assessed by left ventricular pressure-volume measurements in young (4M), middle-aged (18M), aged (24M) and aged with *late-in-life* spermidine supplementation (24M+S) C57BL/6J wild-type mice (see Fig. 1a for the feeding scheme). Graphs show exponential end-diastolic and linear end-systolic pressure-volume relationships, EDPVR (**a**) and ESPVR (**b**), respectively, obtained by inferior *vena cava* occlusion that was performed on 8-10 mice/group. *Note the upward shift of EDPVR (increased passive stiffness) in 24M compared with 4M and the downward shift (reduced passive stiffness) in 24M+S compared with 24M.*  $^{\dagger}p < 0.05$  vs. 4M,  $^{**}p < 0.01$  vs. 24M control (ANCOVA with Bonferroni post-hoc). For more details, please refer to Fig. 1g-i, k, Supplementary Table 6 and Methods section.

## Supplementary Figure 5

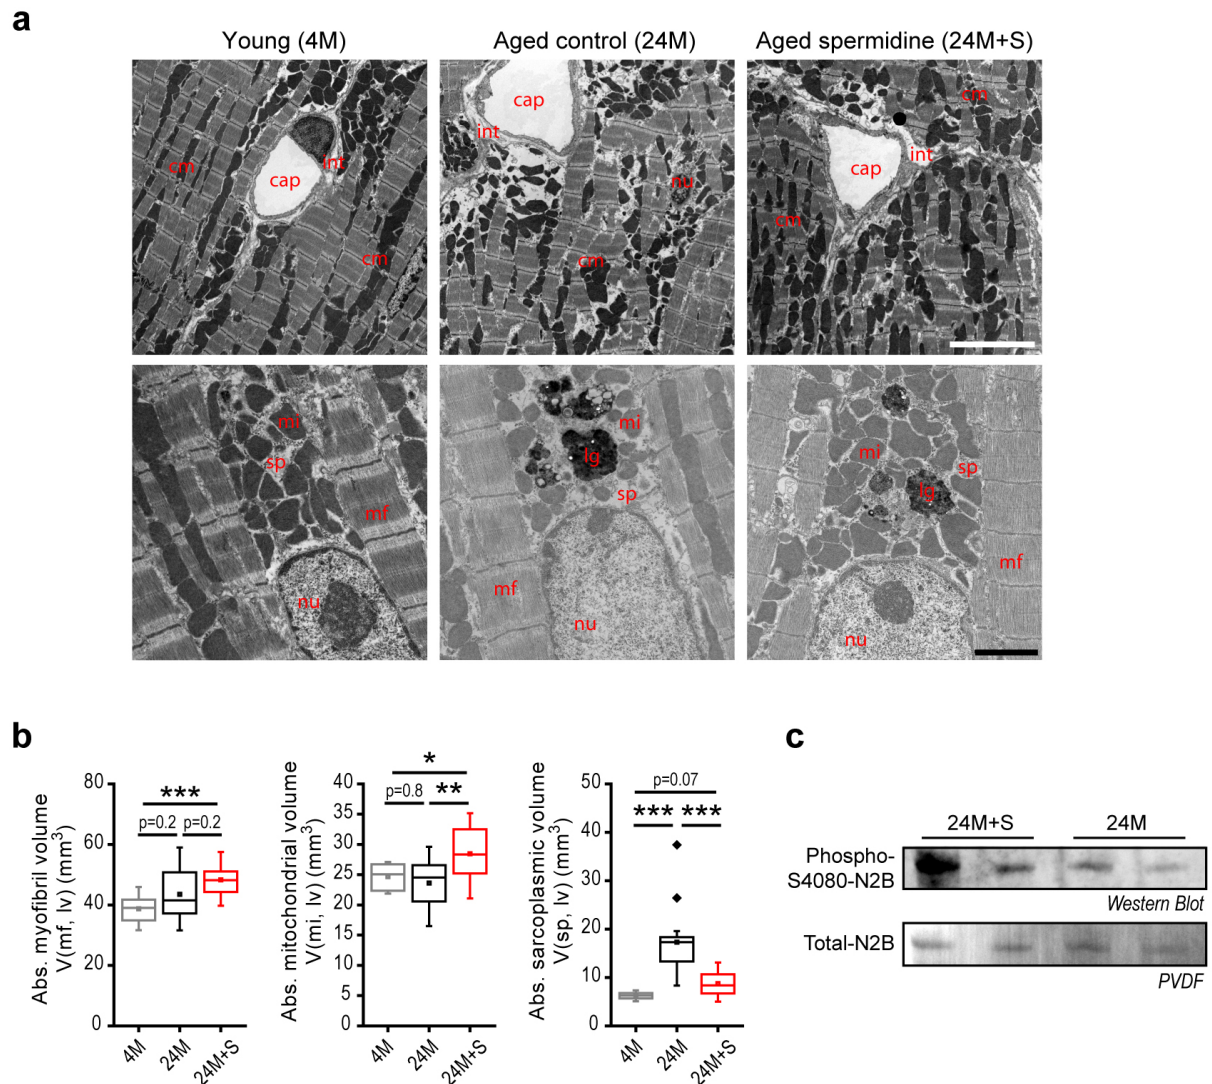

### Supplementary Figure 5. Ultrastructure of cardiomyocytes reveals increased mitochondrial and myofibrillar volume induced by spermidine in aged mice.

**(a)** Representative transmission electron micrographs of left ventricular samples from young (4M), aged (24M) and aged *late-in-life* spermidine-treated (24M+S) C57BL/6J male mice (see Fig. 1a for the feeding scheme). Abbreviations: cap, capillary; cm, cardiomyocyte; int, interstitium; lg, lipofuscin granules; mf, myofibrils; mi, mitochondria; nu, nucleus; sp, sarcoplasm. Scale bars represent 5  $\mu m$  (upper panels) and 2  $\mu m$  (lower panels). **(b)** Quantification of absolute left ventricular myofibril volume,  $V(mf, lv)$ , mitochondrial volume,  $V(mi, lv)$  as well as mitochondria- and myofibril-free sarcoplasmic volume,  $V(sp, lv)$ , using design-based stereology. Data are presented as box-plots with whiskers showing minima and maxima within 1.5 interquartile range.  $N=10/15/14$  (4M/24M/24M+S) mice. \*\*\* $p<0.001$ , \*\* $p<0.01$  using ANOVA with post-hoc Tukey,  $V(mf, lv)$ , Welch's test with post-hoc Games-Howell,  $V(mi, lv)$  or Kruskal-Wallis with corrected multiple-comparisons by Mann-Whitney U-test,  $V(sp, lv)$ , according to normality and equality of variances (for details, please refer to Methods section) **(c)** Representative *Western Blot* probed with phospho-serine 4080-specific N2B antibody (Phospho-S4080-N2B) and PVDF membrane showing total amounts of N2B (*Total-N2B*). See Fig. 2 for quantifications.

## Supplementary Figure 6

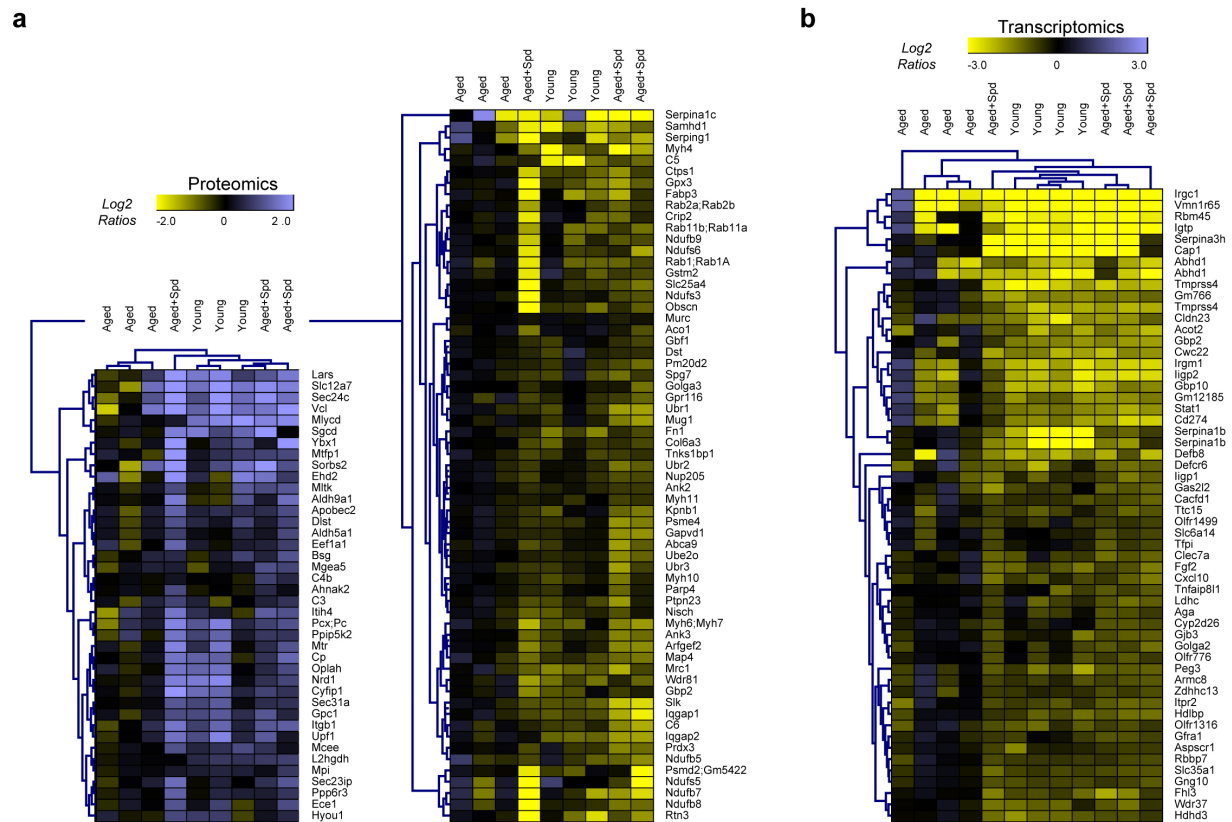

### Supplementary Figure 6. Spermidine rejuvenates the molecular profile of aged mouse hearts.

**(a)** Proteome analysis of cardiac tissue extracts from overnight-fasted 23-month-old C57BL/6J male mice receiving *late-in-life* spermidine supplementation (Aged+Spd) compared to age-matched (Aged) as well as young (Young) controls using label-free mass spectrometry. N=3 mice/group. Ten percent most reproducible changes in protein ratios (Aged+Spd vs. Aged) are depicted ( $\log_2$  ratios) and compared to Young ratios. **(b)** Cardiac transcriptome analysis from 30-32-month-old *life-long* spermidine-treated C57BL/6N female mice compared to untreated and young controls. Significant changes in protein ratios (Aged+Spd vs. Aged) are depicted ( $\log_2$  ratios) and compared to Young ratios. N=4 mice/group. Hierarchical clustering revealed that spermidine-treated mice resembled proteomic and transcriptomic profiles of young animals.

## Supplementary Figure 7

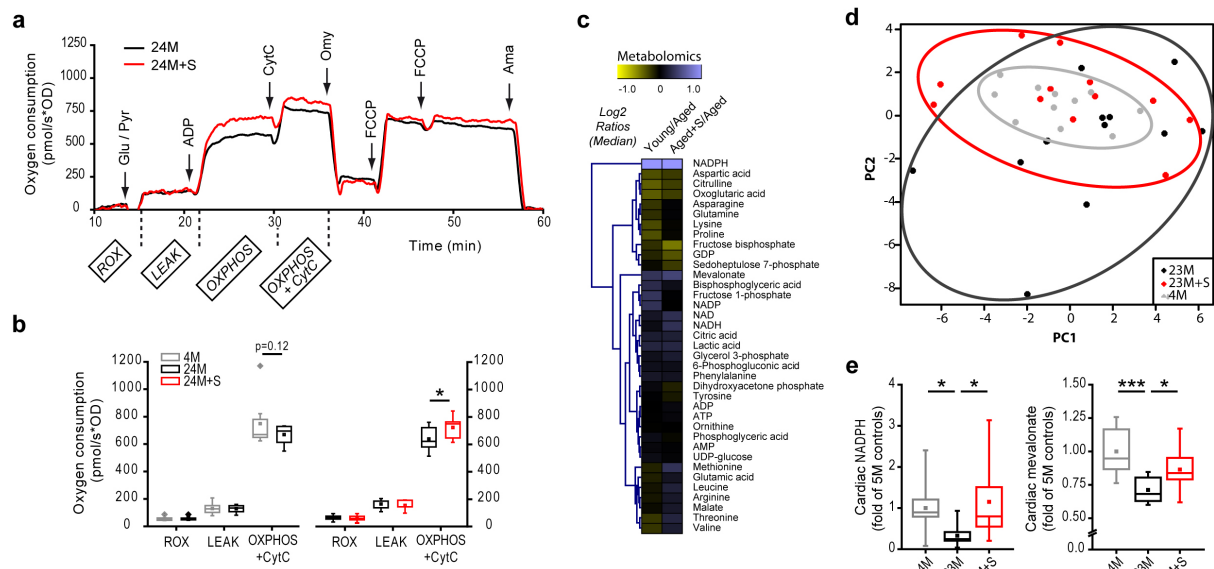

### Supplementary Figure 7. Improved metabolomic profile and mitochondrial respiratory function by spermidine in aged mouse hearts.

**(a, b)** Representative oxygraph recordings (a) and quantification (b) of mitochondrial respiration from isolated cardiac mitochondria incubated with complex I supplying substrates glycine and pyruvate (Gly/Pyr). *ROX*, Residual respiration (*State 1*) in the absence of reduced substrate and ADP; *LEAK*, Respiration compensating for proton leak in the absence of ADP but presence of reduced substrate; *OXPHOS*, ADP-stimulated respiration of coupled mitochondria (quantification shown in Fig. 2c); *OXPHOS+CytC*, Oxphos after addition of cytochrome C. Oligomycin (*Omy*), FCCP, antimycin A (*ama*) were added as controls to block respiration by inhibition of ATP synthase, induce maximum respiration through uncoupling and block uncoupled respiration by complex III inhibition, respectively. N=8/8 (4M/24M) and N=5/5 (24M/24M+S) mice. \* $p < 0.05$  (Paired Student's *t*-test). **(c, d)** Metabolome analyses of cardiac tissue extracts from overnight-fasted wild-type animals with *late-in-life* spermidine supplementation (23M+S) compared to age-matched (23M) as well as young (4M) controls (see Fig. 1a for the feeding scheme). Median ratios (c) of metabolite alterations and principal component analysis (d) obtained from 12 animals are shown. Manually added ellipsoid lines in (d) circumscribe the distribution of the groups. Variance explained by PC1 and PC2: 40%. **(e)** Relative cardiac NADPH and mevalonate levels obtained from metabolomics data presented in (c, d). Values were normalized to young controls (see Methods for details). N=12/11/11 (left) and N=12/12/12 (right) (4M/23M/23M+S) mice. \*\*\* $p < 0.01$ , \* $p < 0.05$  (ANOVA, post-hoc Tukey). For box-and-whisker plots, whiskers show minima and maxima within 1.5 interquartile range.

## Supplementary Figure 8

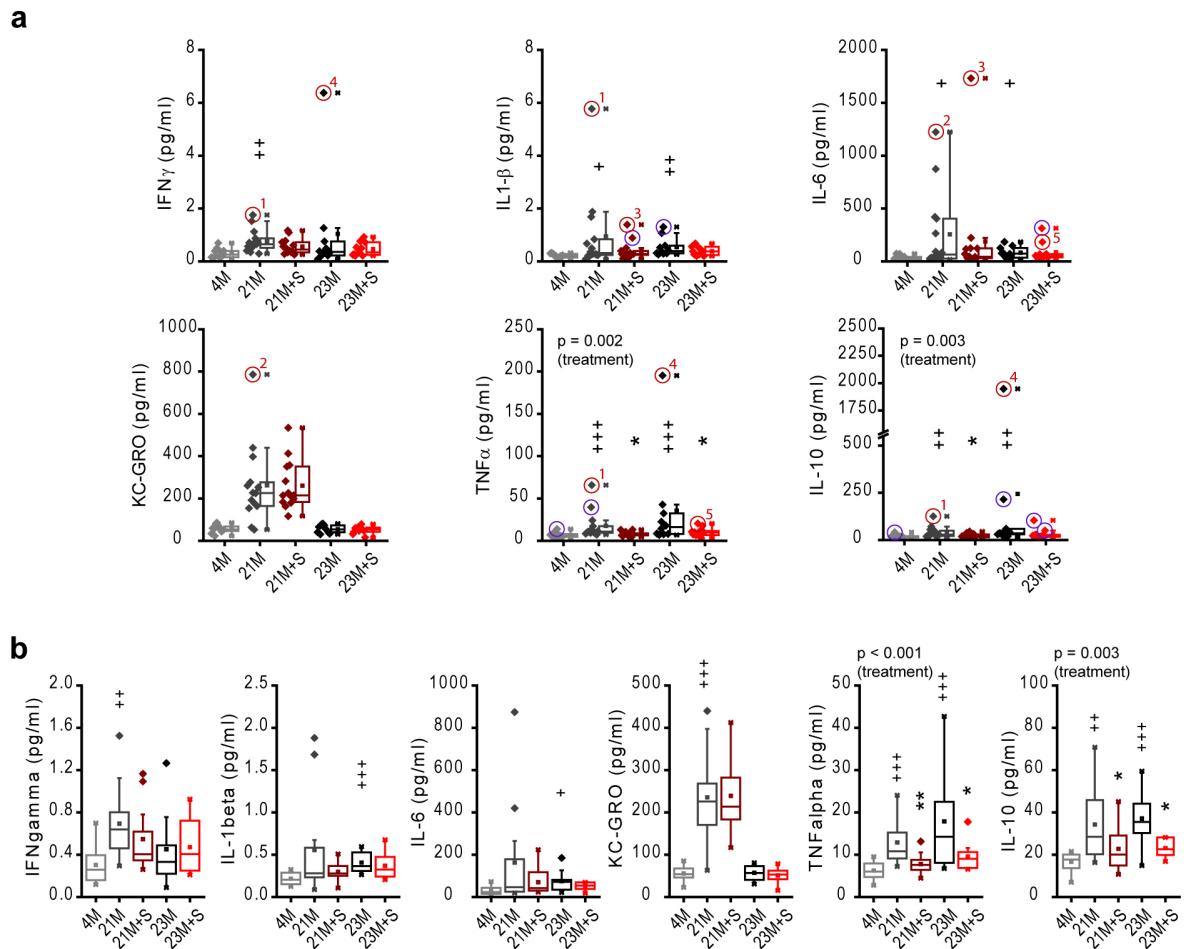

### Supplementary Figure 8. Spermidine suppresses age-induced subclinical systemic inflammation in mice.

Plasma cytokine levels assessed by electrochemiluminescence-based immunoassays from late-in-life spermidine-treated (+S) animals (see Fig. 1a for the feeding scheme). **(a)** Subclinical inflammatory cytokine levels (including all data points) along with the outlier analysis applied to define (chronic) low-grade inflammatory status, which is shown in (b). N=12/14/14/10/11 (4M/21M/21M+S/23M/23M+S) mice. Data are presented as box-plots with whiskers showing minima and maxima within 2.2 interquartile range along with the outliers beyond that range. Red circles depict outliers in animals (numbered 1-5) with potential acute inflammatory condition, while purple circles show outliers in animals with a single cytokine outlier value (see Methods). **(b)** Low-grade (chronic) inflammatory cytokine levels obtained by (i) excluding animals with potential acute inflammatory condition as defined by having two or more statistically-identified (2.2-fold IQR labelling rule) outlier values (red circles in a) and (ii) winsorizing outliers in animals with a single cytokine outlier value (purple circles in a). N=12/12/13/9/10 (4M/21M/21M+S/23M/23M+S) mice. Data are presented as box-plots with whiskers showing minima and maxima within 1.5 interquartile range.

P-values indicate factor comparisons by two-way ANOVA including all 21M and 23M groups. \*\* $p < 0.01$ , \* $p < 0.05$  vs. age-matched control (simple main effects).

+++ $p < 0.001$ , ++ $p < 0.01$ , + $p < 0.05$  vs. 4 month-old control (ANOVA with post-hoc Tukey, Welch's test with post-hoc Games-Howell or Kruskal-Wallis followed by corrected multiple comparisons by Mann-Whitney U-test according to normality and equality of variances).



## Supplementary Figure 9

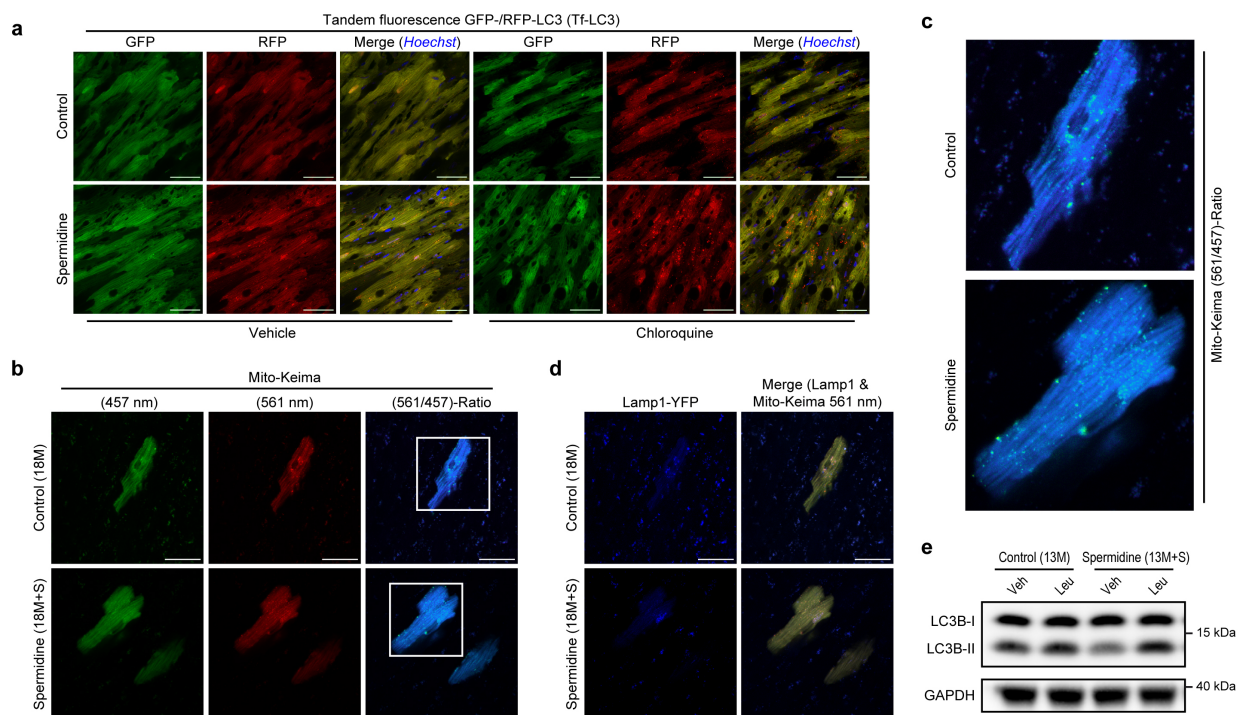

### Supplementary Figure 9. Cardiac autophagy and mitophagy is induced by spermidine in mice.

**(a)** Young (3-month-old) transgenic male mice harboring cardiac-specific expressed tandem-fluorescence mRFP-GFP-LC3 (tf-LC3) were subjected to spermidine treatment for 2 weeks and hearts were analyzed by confocal microscopy 4 hours after injection of chloroquine or vehicle to assess autophagic flux. Representative confocal images are shown. Orange puncta in merged images represent autophagosomes, while red puncta indicate autolysosomes. Nuclei were visualized by *Hoechst* staining. Scale bars represent 50  $\mu$ m. **(b-d)** Evaluation of mitophagy by AAV9-Mito-Keima and AAV9-Lamp1-YFP injected to aged (18-month-old) C57BL/6J wild-type male mice. Hearts were examined after 3 weeks of spermidine supplementation and compared to age-matched controls. Panel b shows representative images of Mito-Keima excited at 457 nm (shown in green color) or at 561 nm (shown in red color) as well as a ratiometric image (561 nm/457 nm excitation, shown in blue color). Panel c shows enlargement of marked areas in (b). Notice the higher ratiometric signal (defined as Mito-Keima positive area), indicating higher mitophagy in spermidine-treated versus control animals. Panel d depicts Lamp1-YFP (blue color) and the merged image of Mito-Keima fluorescence excited at 561 nm (red color) and Lamp1-YFP (blue color). Scale bars represent 50  $\mu$ m. **(e)** Assessment of autophagic flux by LC3 immunoblotting after intra-peritoneal injection of leupeptin (Leu) or vehicle (Veh) in 13-month-old C57BL/6J wild-type mice supplemented for 4 weeks with spermidine. Representative immunoblot probed with LC3- or GAPDH-specific antibodies is shown.

## Supplementary Figure 10

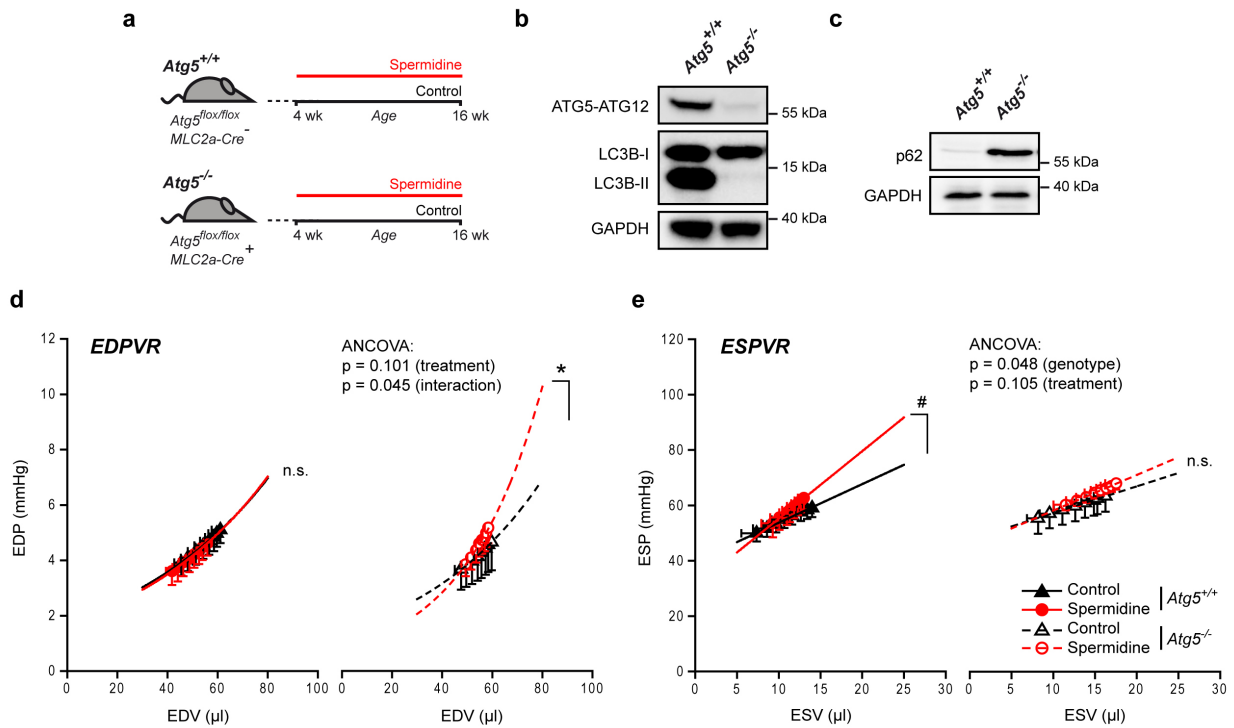

### Supplementary Figure 10. Spermidine aggravates cardiac diastolic function in cardiomyocyte-specific *Atg5*-deficient mice.

Cardiac function was assessed by left ventricular pressure-volume measurements in control and spermidine-treated *Atg5*<sup>flx/flx</sup>/*MLC2a-Cre*<sup>-</sup> (*Atg5*<sup>+/+</sup>) and *Atg5*<sup>flx/flx</sup>/*MLC2a-Cre*<sup>+</sup> (*Atg5*<sup>-/-</sup>) mice at the age of 16 weeks. **(a)** Scheme depicting experimental design. Spermidine (3 mM) was supplemented to drinking water from the age of 4 weeks (after weaning) until the assessment of cardiac function **(b, c)** Representative immunoblot analysis confirming deletion of *Atg5* and autophagy incompetence in isolated ventricular cardiomyocytes of *Atg5*<sup>-/-</sup> mice. Protein extracts from isolated cardiomyocytes obtained from 16-week-old animals were subjected to SDS-page and probed with antibodies against *Atg5*, LC3 and GAPDH, as a loading control, (b) or p62 and GAPDH, as a loading control, (c). **(d-e)** Exponential end-diastolic and linear end-systolic pressure-volume relationships, EDPVR (d) and ESPVR (e), respectively, obtained by inferior vena cava occlusion performed on 9-11 mice/group. Note the steeper slope of ESPVR (improved contractility) in spermidine-treated *Atg5*<sup>+/+</sup> mice compared with genotype-matched controls and the ESPVR rightward shift (impaired contractility) in both *Atg5*<sup>-/-</sup> groups, especially the spermidine-treated, compared with *Atg5*<sup>+/+</sup> groups. Also note the upward shift of EDPVR (increased passive stiffness) in spermidine-fed *Atg5*<sup>-/-</sup> mice compared with genotype-matched controls. Indicated p-values represent factor comparisons by two-way ANCOVA. #p<0.06, \*p<0.05 vs. respective control (simple main effects). For more details, please refer to Fig. 3g-h, Supplementary Table 12 and Methods section.

## Supplementary Figure 11

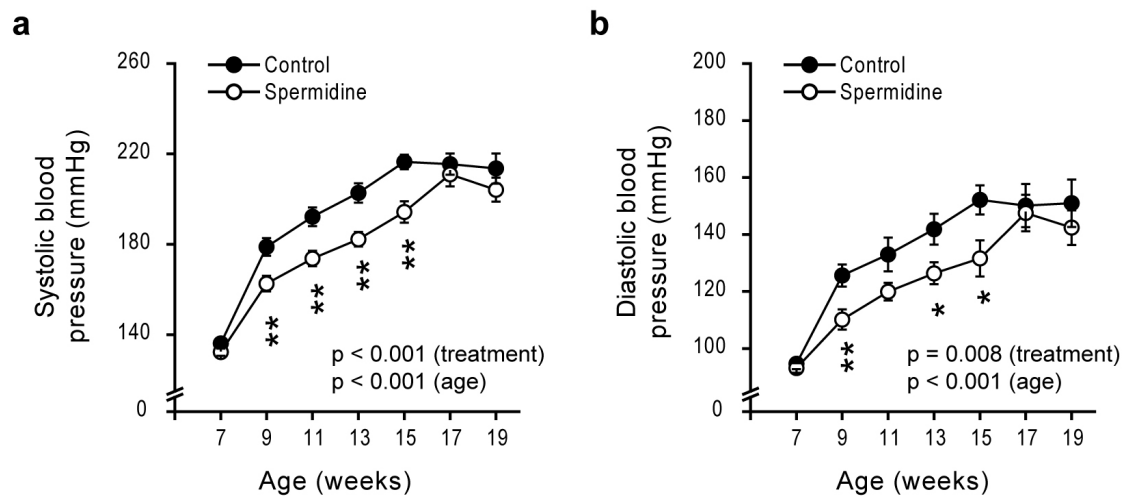

### Supplementary Figure 11. Spermidine delays high-salt diet-induced increase in systolic and diastolic blood pressures.

Systolic (**a**) and diastolic (**b**) blood pressures assessed by non-invasive tail-cuff method in spermidine-fed vs. control *Dahl* salt-sensitive rats receiving high-salt diet (see Fig. 4a for the feeding scheme). Data show means  $\pm$  s.e.m. (N=10 rats/group). P-values represent factor comparisons calculated by mixed two-way ANOVA. \*\* $p < 0.01$ , \* $p < 0.05$  vs. age-matched control (simple main effects).

## Supplementary Figure 12

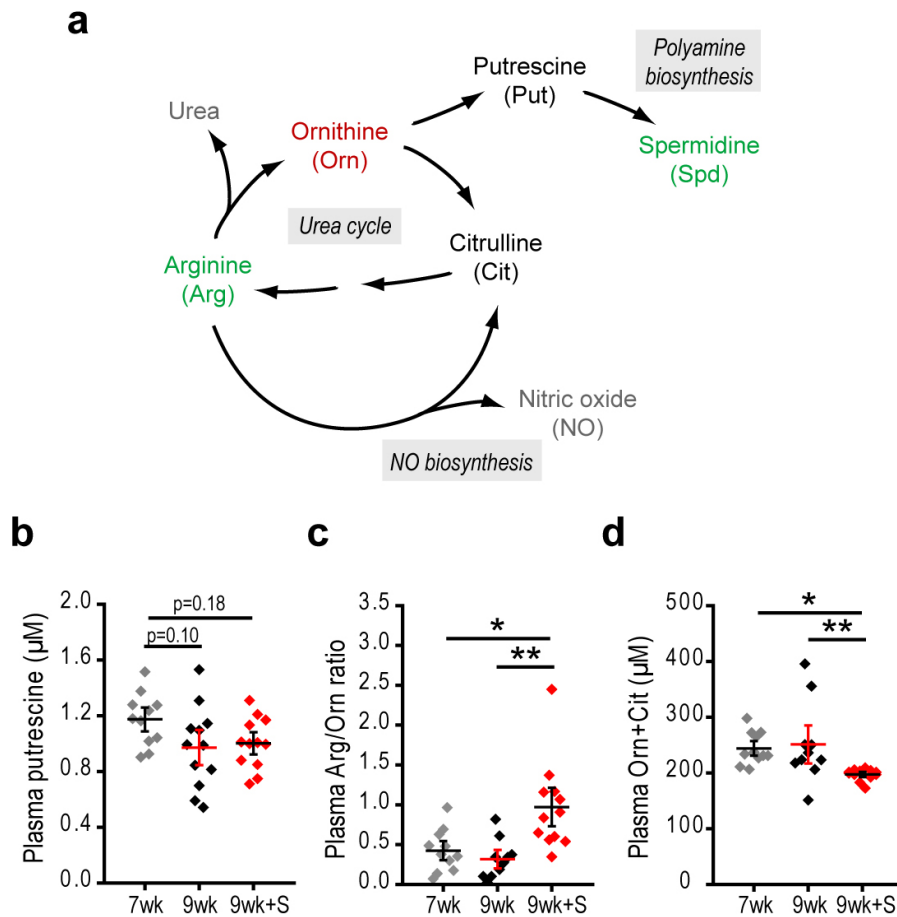

### Supplementary Figure 12. Spermidine increases arginine and NO bioavailability via altering ornithine metabolism in *Dahl* salt-sensitive rats.

**(a)** Simplified scheme depicting the interconnection of arginine metabolism (urea cycle) with polyamine and nitric oxide (NO) biosynthesis pathways. **(b)** Plasma levels of putrescine, **(c)** plasma arginine/ornithine ratio (Arg/Orn ratio) and **(d)** plasma levels of ornithine and citrulline combined (Orn+Cit) of spermidine-fed (+S) *Dahl* salt-sensitive rats compared with controls calculated from HPLC/MS- (ornithine) and HPLC-based (arginine and citrulline) quantification of plasma metabolite concentrations.  $N=11/12/12$  (b) and  $N=11/10/12$  (c, d) (7wk/9wk/9wk+S) rats. Data are presented as box-plots with whiskers showing minima and maxima within 1.5 interquartile range. \*\* $p<0.01$ , \* $p<0.05$  (ANOVA, post-hoc Tukey). Wk, weeks.

## Supplementary Figure 13

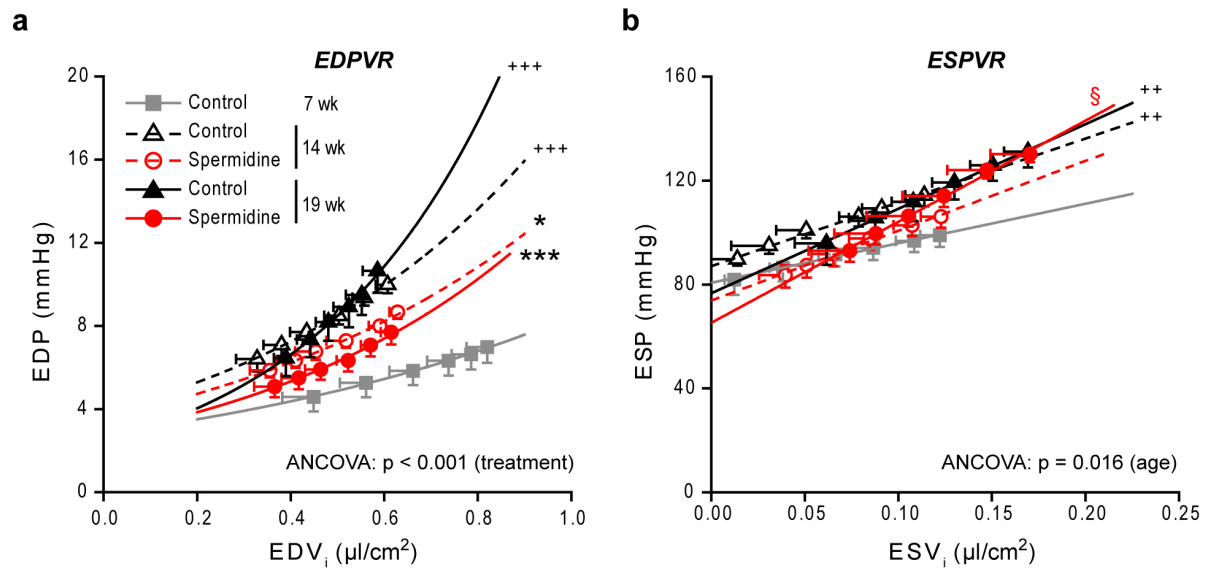

### Supplementary Figure 13. Spermidine improves cardiac diastolic function by reducing left ventricular stiffness in high-salt diet-fed *Dahl* salt-sensitive rats.

Cardiac function was assessed by left ventricular pressure-volume measurements in *Dahl* salt-sensitive rats fed a high-salt diet starting from the age of 7 weeks (see Fig. 4a for the feeding scheme) with a subset of rats co-administrated with spermidine in drinking water. Exponential end-diastolic and linear end-systolic pressure-volume relationships, EDPVR (**a**) and ESPVR (**b**), respectively, obtained by inferior *vena cava* occlusion performed on 9-10 rats/group are depicted with volumes indexed to body surface area to account for differences in body size (see Methods section). *Note the upward shift of EDPVR (increased passive stiffness) in 14 and 19 wk controls compared with 7 wk control and the downward shift (decreased passive stiffness) in spermidine-treated 14 and 19 wk animals compared with their age-matched controls.*

P-values represent factor comparisons by two-way ANCOVA including all 14 and 19 wk groups. \*\*\* $p < 0.001$ , \* $p < 0.05$  vs. age-matched control (simple main effects).

§ $p < 0.05$  vs. treatment-matched 14 wk (simple main effects); \*\*\* $p < 0.001$ , ++ $p < 0.01$  vs. 7 wk control (ANCOVA comparing controls with post-hoc Bonferroni). For more details, please refer to Fig. 4f-h, k, Supplementary Table 15 and Methods section.

## Supplementary Figure 14

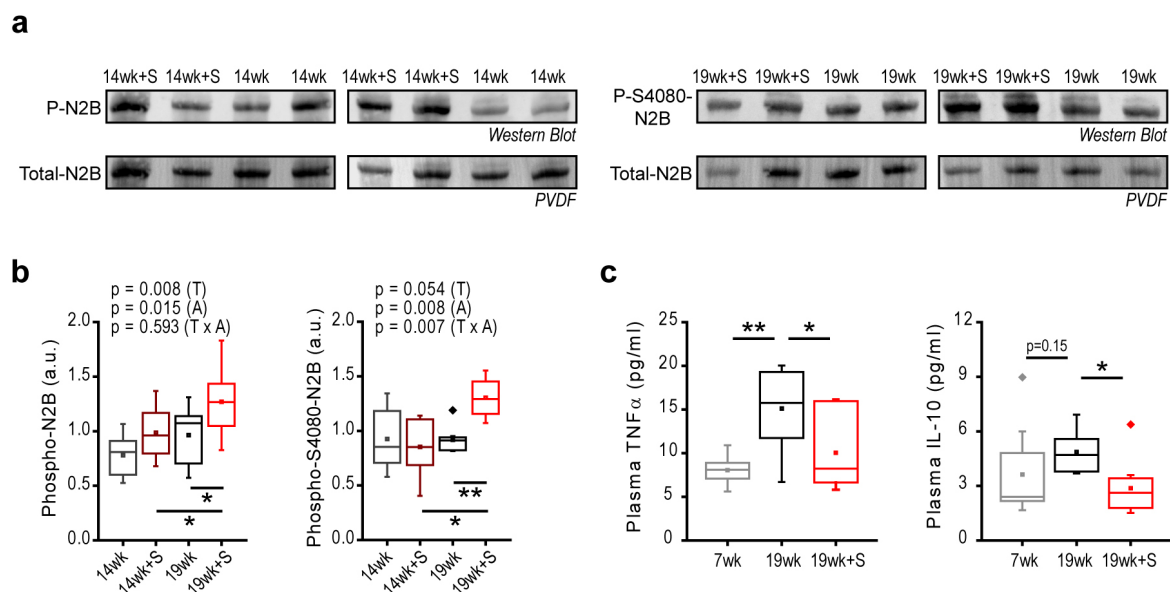

### Supplementary Figure 14. Spermidine increases titin-phosphorylation and suppresses circulating levels of TNF $\alpha$ in Dahl salt-sensitive rats.

*Dahl* salt-sensitive rats were fed a high-salt diet starting from the age of 7 weeks with a subset of rats co-administered with spermidine (+S) in the drinking water (see Fig. 4a for the feeding scheme). Cardiac tissue extracts (a, b) or plasma obtained from EDTA-collected blood (c) were analyzed at the indicated ages. **(a, b)** Representative *Western Blots* (a) probed with pan-phospho-serine/threonine- or Phospho-S4080-N2B-specific antibodies depicting N2B phosphorylation (P-N2B and P-S4080-N2B, respectively). *PVDF* membrane shows total amounts of N2B (*Total-N2B*). Blots/membranes were quantified by densitometry (b) using normalization standards for inter-gel comparisons (see Methods). N=8 rats/group. P-values represent factor (T, treatment; A, age) comparisons by two-way ANOVA. \*\*p<0.01, \*p<0.05 (simple main effects). **(c)** Plasma cytokine levels assessed by electrochemiluminescence-based immunoassays. N=12/7/10 (7wk/19wk/19wk+S) rats. \*\*p<0.01, \*p<0.05 (ANOVA, post-hoc Tukey). For box-and-whisker plots, whiskers show minima and maxima within 1.5 interquartile range. Wk, weeks.

## Supplementary Figure 15

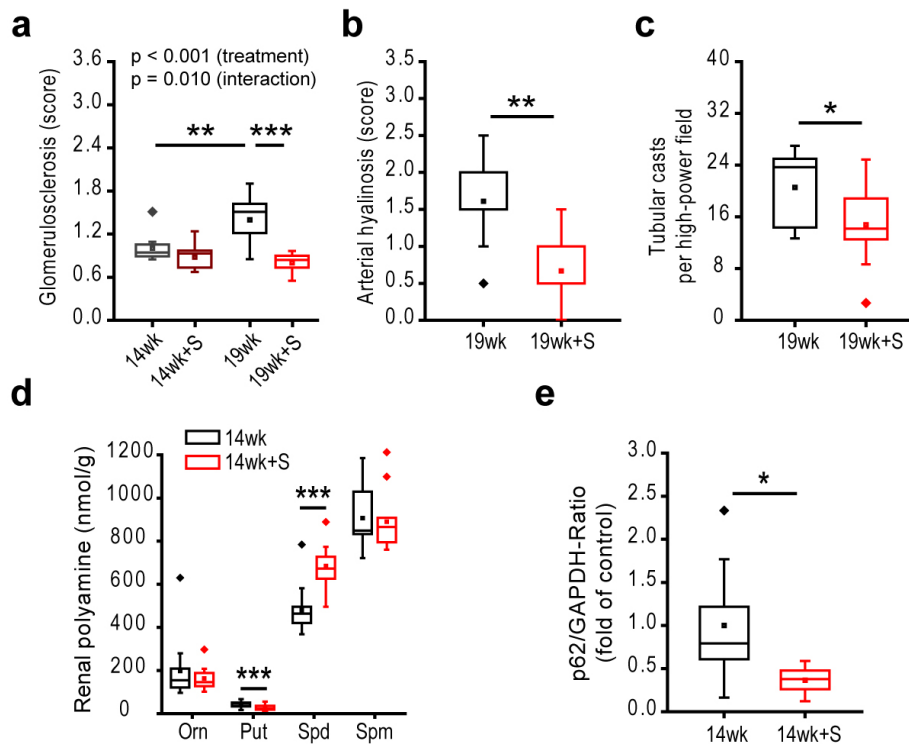

### Supplementary Figure 15. Spermidine protects from salt-induced kidney damage in *Dahl* salt-sensitive rats.

**(a-c)** Glomerulosclerosis (a) and arterial hyalinosis (b) were analyzed at indicated ages semi-quantitatively (*score*-based evaluation) on PAS-stained renal tissue obtained from high-salt diet-fed *Dahl* salt-sensitive rats with a subset of rats co-administered with spermidine (+S) in the drinking water (see Fig. 4a for the feeding scheme). The number of renal tubular casts (c) was counted in 6 high-power fields. N=9 rats/group. **(d)** Kidney polyamines content in 14-week-old rats. Orn, ornithine; Put, putrescine; Spd, spermidine; Spm, spermine. N=13/11 (14wk/14wk+S) **(e)** Densitometric quantification of immunoblot signals obtained from kidney protein extracts (14-week-old rats) probed with p62- and GAPDH-specific antibodies. p62 signals were normalized to GAPDH, which served as a loading control. N=9/12 (14wk/14wk+S). Indicated p-values represent factor comparisons by two-way ANOVA (panel a). \*\*\*p<0.001, \*\*p<0.01, \*p<0.05 (Student's *t*-test). Data are presented as box-plots with whiskers showing minima and maxima within 1.5 interquartile range. Wk, weeks.

## Supplementary Figure 16

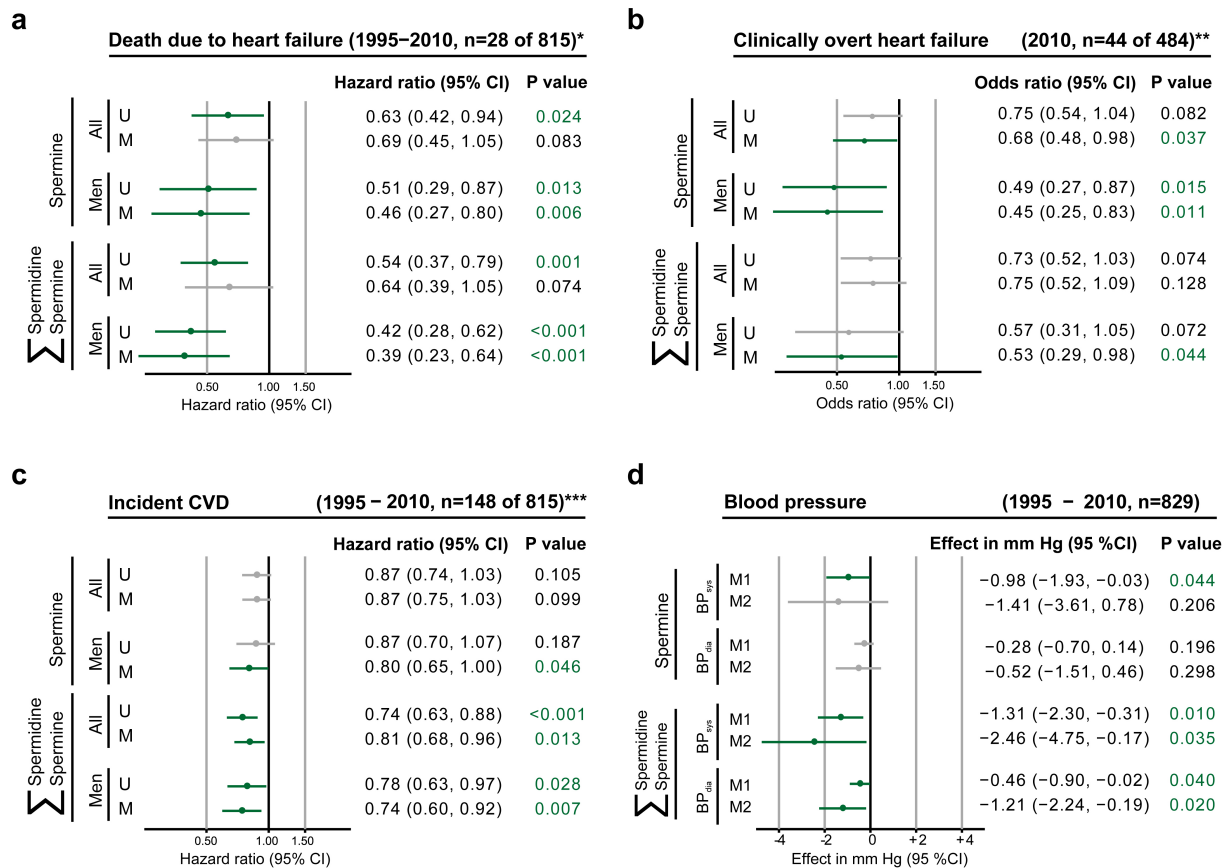

### Supplementary Figure 16. Dietary polyamines inversely correlate with human cardiovascular disease.

**(a-c)** Associations of polyamine intakes (spermine or sum of spermine and spermidine) with (a) death due to heart failure, (b) clinically overt heart failure and (c) incident cardiovascular disease (CVD, composite of acute coronary artery disease, stroke and death due to vascular disease) in humans. Hazard ratios (panels a and c, time-to-event analysis) and odds ratios (panel b, cross-sectional analysis) are for one standard deviation higher intakes in given polyamines. Models were unadjusted (U) or had multivariable adjustment (M) for age, sex, total caloric intake, current smoking, diabetes, alcohol consumption, and diastolic blood pressure. \*Death due to heart failure was defined according to ICD codes I50.x, I13.0, I13.2, I11.00, I11.01, or I97.1 and the results represent sub-distribution hazard ratios based on the Fine and Gray model and account for the competing risk of death due to causes unrelated to heart failure. \*\*Diagnosis of heart failure (ascertained in 2010) relied on gold standard Framingham criteria. \*\*\*See methods for incident CVD criteria. **(d)** Associations of polyamine intakes (spermine or sum of spermine and spermidine) with systolic (BP<sub>sys</sub>) and diastolic (BP<sub>dia</sub>) blood pressures repeatedly assessed between 1995 and 2010 in 829 participants of the Bruneck Study. Effects represent the average difference in blood pressure (mmHg) associated with a one standard deviation higher intake of given polyamines (M1) or between the first and third tertile group (M2) under adjustment for age, sex, and total caloric intake.



## Supplementary Figure 17

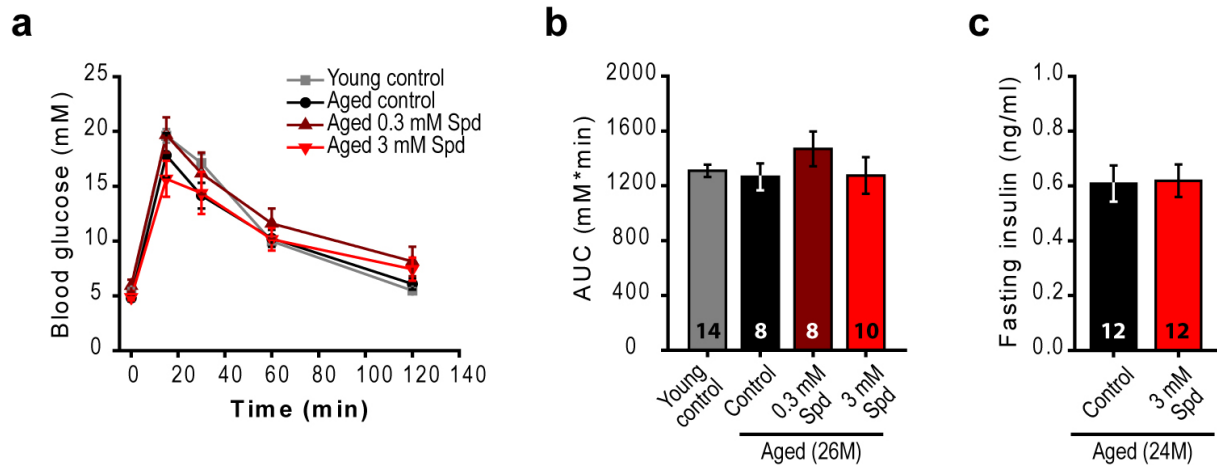

**Supplementary Figure 17. Glucose and insulin metabolism are not affected by dietary spermidine supplementation in aging C57BL/6 mice.**

(a) Blood glucose levels and (b) area under the curve (AUC) of intra-peritoneal glucose tolerance test (i.p. GTT) in C57BL/6N female mice with *life-long* supplementation of spermidine (Spd) in the drinking water (see Fig. 1a for the feeding scheme) compared to young (5M) or age-matched (26M) controls (M, month). (c) Plasma insulin levels after 3 hours of fasting in 24-month-old C57BL/6J male mice supplemented with Spd for 10 months or in age-matched controls. Data show means  $\pm$  s.e.m. with number of mice indicated in the bars.

## Supplementary Figure 18

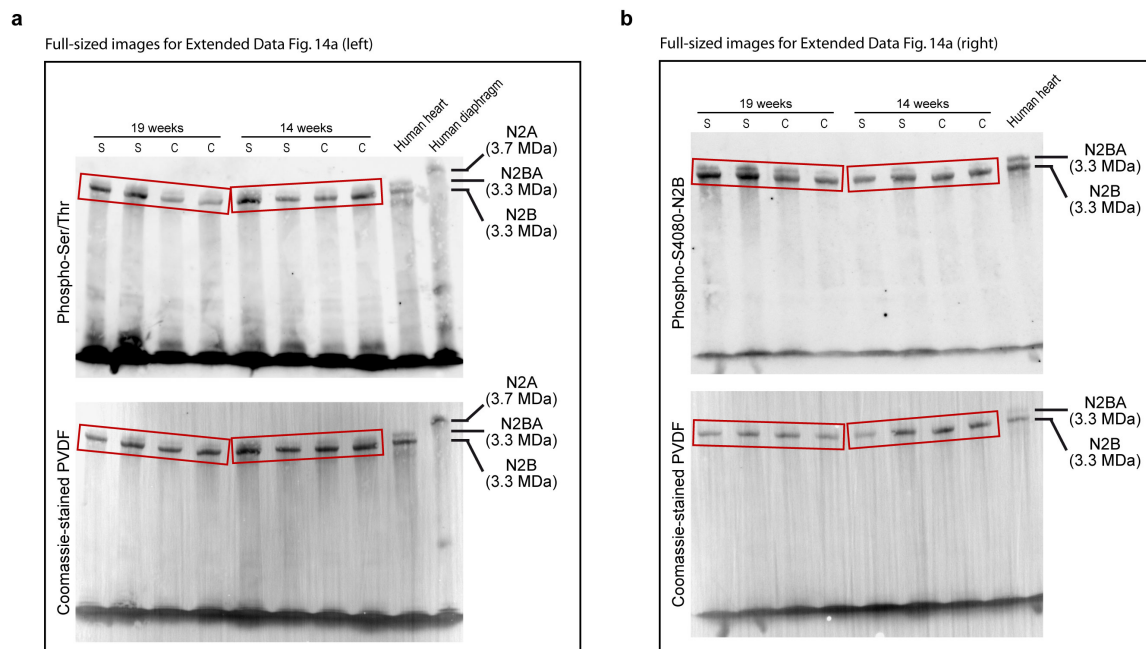

... Figure continued on the following page.

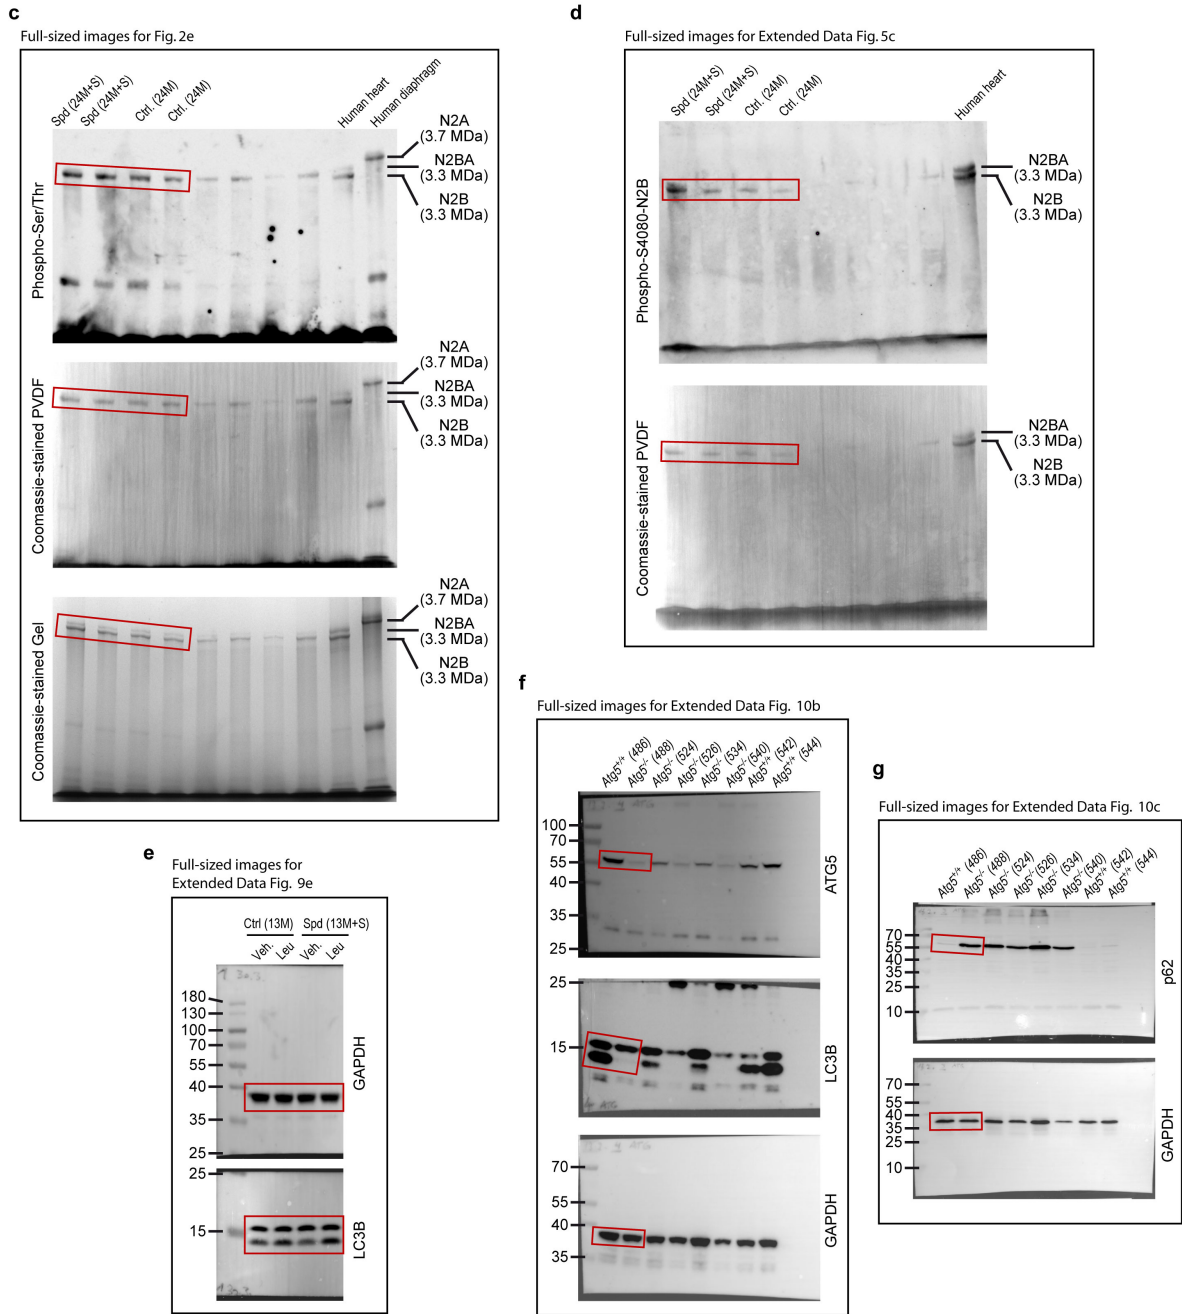

**Supplementary Figure 18. Full-scans of western blots, membranes and gels.**

Red boxes highlight areas that were cropped and shown in the indicated Figures.

## Supplementary Table 1:

### Number of mice included in lifespan experiments.

Total number of mice used for lifespan experiments as well as details on the number of sacrificed animals that were either included in the survival analyses (i.e. estimated deaths based on the *end-of-life* criteria defined in Methods) or censored due to severe bite wounds, wounds after excessive grooming or ulcerative dermatitis.

| Aging cohort | Mouse strain              | Sex           | Treatment strategy            | Treatment group | Animal numbers |                |                  |          |
|--------------|---------------------------|---------------|-------------------------------|-----------------|----------------|----------------|------------------|----------|
|              |                           |               |                               |                 | Total          | Natural deaths | Estimated deaths | Censored |
| 1            | C57BL/6J:Cr1 <sup>1</sup> | Female        | <i>Life-long</i> treatment    | Control         | 40             | 14             | 9                | 17       |
|              |                           |               |                               | Spermidine      | 41             | 17             | 3                | 21       |
|              |                           |               |                               | Spermine        | 17             | 13             | 2                | 2        |
|              |                           |               |                               | Putrescine      | 20             | 14             | 1                | 5        |
| 2            | C57BL/6J <sup>2</sup>     | Male & Female | <i>Late-in-life</i> treatment | Control         | 91             | 69             | 9                | 13       |
|              |                           |               |                               | Spermidine      | 87             | 64             | 5                | 18       |

<sup>1</sup>Obtained from Charles River Laboratories

<sup>2</sup>Obtained from our *in-house* animal facility (see Methods)

## Supplementary Table 2:

### Lifespan estimates and quartiles

Lifespan estimates and quartiles of the aging experiments presented in Fig. 1b-d.

| Aging cohort | Treatment strategy            | Treatment group | Lifespan estimates & quartiles |               |                                |                |
|--------------|-------------------------------|-----------------|--------------------------------|---------------|--------------------------------|----------------|
|              |                               |                 | Mean (± s.e.m.)                | 25% (95% CI)  | 50% (95% CI) (Median lifespan) | 75% (95% CI)   |
| 1            | <i>Life-long</i> treatment    | Control         | 796 ± 22                       | 738 (680/768) | 801 (746/859)                  | 869 (807/933)  |
|              |                               | Spermidine      | 880 ± 24                       | 820 (700/896) | 899 (834/966)                  | 955 (899/1009) |
|              |                               | Spermine        | 892 ± 28                       | 787 (757/913) | 913 (801/955)                  | 955 (927/1047) |
|              |                               | Putrescine      | 815 ± 35                       | 717 (647/822) | 822 (722/886)                  | 926 (822/1005) |
| 2            | <i>Late-in-life</i> treatment | Control         | 769 (± 17)                     | 663 (637/695) | 770 (723/827)                  | 889 (835/916)  |
|              |                               | Spermidine      | 819 (±16)                      | 729 (705/769) | 847 (792/887)                  | 922 (895/958)  |

### Supplementary Table 3:

#### Advanced Age (28-month-old mice) Pathology

Tissue pathology and assessment of tumor incidence and severity in *life-long* spermidine-treated 28-month-old mice (28M+S) at the indicated concentrations of spermidine (in drinking water) compared to age-matched controls (28M) or young adult mice (5M).

| Animal | Group# | Tissue pathology               |                             |                        |                     |          |                                                                               | Tumor severity <sup>§</sup> | Cardiac pathology                                           |                   |
|--------|--------|--------------------------------|-----------------------------|------------------------|---------------------|----------|-------------------------------------------------------------------------------|-----------------------------|-------------------------------------------------------------|-------------------|
|        |        | Liver                          | Kidney                      | Spleen                 | Brain               | Lung     | Others                                                                        |                             | Abnorm-<br>alities                                          | Estimated<br>area |
| 1      | 5M     | microgranuloma,<br>lipofuscine | NAD                         | siderosis              | NAD                 | NAD      |                                                                               |                             | NAD                                                         | 0                 |
| 2      | 5M     | microgranuloma,<br>lipofuscine | protein casts               | NAD                    | NAD                 | NAD      |                                                                               |                             | NAD                                                         | 0                 |
| 3      | 5M     | NAD                            | NAD                         | NAD                    | NAD                 | NAD      |                                                                               |                             | NAD                                                         | 0                 |
| 4      | 5M     | NAD                            | NAD                         | NAD                    | NAD                 | NAD      |                                                                               |                             | NAD                                                         | 0                 |
| 5      | 5M     | microgranuloma                 | NAD                         | NAD                    | NAD                 | NAD      |                                                                               |                             | NAD                                                         | 0                 |
| 6      | 5M     | microgranuloma                 | NAD                         | NAD                    | slight meningitis   | NAD      |                                                                               |                             | NAD                                                         | 0                 |
| 7      | 5M     | NAD                            | NAD                         | NAD                    | slight meningitis   | NAD      |                                                                               |                             | small infarct                                               | <1%               |
| 8      | 5M     | NAD                            | NAD                         | NAD                    | NAD                 | NAD      |                                                                               |                             | NAD                                                         | 0                 |
| 9      | 5M     | microgranuloma                 | NAD                         | siderosis              | NAD                 | NAD      |                                                                               |                             | NAD                                                         | 0                 |
| 10     | 28M    | NAD                            | protein casts               | siderosis              | slight encephalitis | NAD      | histiocytic sarcoma                                                           | m                           | NAD                                                         | 0                 |
| 11     | 28M    | microgranuloma                 | cyst, KALT                  | siderosis              | NAD                 | BALT     | pituitary adenoma,<br>apoplex                                                 | m                           | NAD                                                         | 0                 |
| 12     | 28M    | steatosis,<br>microgranuloma   | chronic nephritis,<br>scars | NAD                    | NAD                 | BALT     | pituitary adenoma                                                             | b                           | NAD                                                         | 0                 |
| 13     | 28M    | microgranuloma,<br>lipofuscine | NAD                         | histiocytic<br>sarcoma |                     |          |                                                                               | m + s                       | small cardiomyocyte<br>degeneration, histiocytic<br>sarcoma | ~1%               |
| 14     | 28M    | microgranuloma,<br>lipofuscine | lymphoma                    | siderosis              | NAD                 | lymphoma |                                                                               | m + s                       | NAD                                                         | 0                 |
| 15     | 28M    | microgranuloma                 | protein casts               | siderosis              | NAD                 | BALT,    | pituitary adenoma,<br>pheochromocytoma,<br>follicular cell<br>adenoma thyroid | b;b;b                       | NAD                                                         | 0                 |

|    |                |                                                    |                                   |                                  |                        |                                               |                                                             |          |                                      |     |
|----|----------------|----------------------------------------------------|-----------------------------------|----------------------------------|------------------------|-----------------------------------------------|-------------------------------------------------------------|----------|--------------------------------------|-----|
| 16 | 28M            | microgranuloma, steatosis                          | NAD                               | siderosis                        | NAD                    | lymphoma                                      | pituitary carcinoma                                         | m + s; m | NAD                                  | 0   |
| 17 | 28M            | lymphoma                                           | lymphoma                          | lymphoma                         | NAD                    | lymphoma                                      |                                                             | m + s    | NAD                                  | 0   |
| 27 | 28M+S (0.3 mM) | histiocytic sarcoma, multifocal livercell necrosis | chronic nephritis, scars          | histiocytic sarcoma              | NAD                    | histiocytic sarcoma, bronchioalveolar adenoma |                                                             | m + s    |                                      | 0   |
| 28 | 28M+S (0.3 mM) | NAD                                                | KALT                              | siderosis                        | NAD                    | BALT, pneumonia                               | pituitary adenoma                                           | b        | NAD                                  | 0   |
| 29 | 28M+S (0.3 mM) | NAD                                                | NAD                               | NAD                              | NAD                    | BALT                                          | pituitary adenoma, apoplex, follicular cell adenoma thyroid | m        | NAD                                  | 0   |
| 18 | 28M+S (3 mM)   | histiocytic sarcoma, multifocal livercell necrosis | histiocytic sarcoma               | histiocytic sarcoma              | NAD                    | histiocytic sarcoma                           | pituitary adenoma                                           | m + s    | histiocytic sarcoma                  | ~3% |
| 19 | 28M+S (3 mM)   | Polyploidy                                         | lymphoma                          | siderosis                        | meningeosis leukaemica | lymphoma                                      | pituitary adenoma                                           | s; b     | NAD                                  | 0   |
| 20 | 28M+S (3 mM)   | histiocytic sarcoma, multifocal livercell necrosis | histiocytic sarcoma, tumorthrombi | histiocytic sarcoma              | histiocytic sarcoma    | histiocytic sarcoma, tumorthrombi             | pituitary adenoma                                           | m + s    | tumorthrombi                         | <1% |
| 21 | 28M+S (3 mM)   | histiocytic sarcoma, amyloidosis                   | histiocytic sarcoma, amyloidosis  | histiocytic sarcoma, amyloidosis | NAD                    | histiocytic sarcoma                           | pituitary adenoma                                           | m + s    | amyloidosis                          | <1% |
| 22 | 28M+S (3 mM)   | histiocytic sarcoma                                | histiocytic sarcoma               | histiocytic sarcoma              | NAD                    | NAD                                           |                                                             | m + s    | NAD                                  | 0   |
| 23 | 28M+S (3 mM)   | microgranuloma, lipofuscine                        | protein casts                     | siderosis                        | hydrocephalus          | local pneumonia                               | pheochromocytoma, pituitary carcinoma                       | m        | small infarct base                   | ~2% |
| 24 | 28M+S (3 mM)   | amyloidosis                                        | amyloidosis, chronic nephritis    | amyloidosis                      | NAD                    | amyloidosis                                   |                                                             |          | amyloidosis, multiple small infarcts | ~5% |
| 25 | 28M+S (3 mM)   | microgranuloma                                     | NAD                               | siderosis                        | NAD                    | BALT,                                         | histiocytic sarcoma, pituitary adenoma, pheochromocytoma    | m; b     | NAD                                  | 0   |
| 26 | 28M+S (3 mM)   | steatosis                                          | NAD                               | siderosis                        | NAD                    | BALT,                                         | pituitary adenoma                                           | b        | NAD                                  | 0   |

# Age at necropsy in months (M). Compare also to Fig. 1a: 5M, young controls; 28M, aged controls; 28M+S, aged spermidine-treated. Spermidine was supplemented to drinking water starting from the age of 5 months (*life-long* treatment) at the indicated concentrations.

§ According to "WHO International Classification of Rodent Tumors" (Ref. 89).

Abbreviations used: NAD, no abnormalities detected; LALT, liver-associated lymphatic tissue; KALT, kidney-associated lymphatic tissue; BALT, bronchus-associated lymphatic tissue

## Supplementary Table 4:

### End-of-life (EOL) animal necropsy

Tissue pathology and assessment of tumor incidence and severity as well as cause of death estimation in *end-of-life* animals identified to be close to their natural death due to aging and therefore euthanized (refer to methods for details).

| EOL animal | Group   | Age at necropsy (days) | Tissue pathology                                |                                                                   |                                 |                                  |                                 |                     | Tumor severity <sup>s</sup> | Cardiac pathology |                |                             |                         | Most-likely cause of death |
|------------|---------|------------------------|-------------------------------------------------|-------------------------------------------------------------------|---------------------------------|----------------------------------|---------------------------------|---------------------|-----------------------------|-------------------|----------------|-----------------------------|-------------------------|----------------------------|
|            |         |                        | Liver                                           | Kidney                                                            | Spleen                          | Brain                            | Lung                            | Others              |                             | Abnorm- alities   | Estimated area | Cleaved Caspase-3 pos. area | Cardiac death probable? |                            |
| 1          | Control | 696                    | polyploidy, parenchyma atrophy                  | KALT, tubule epithelia regenerate, scars, protein casts           | lymphatic hyperplasia           | processing artefacts (vacuoles)  | bronchioalveolar adenocarcinoma |                     | m                           | NAD               | 0              | 0                           | no                      | n.d.                       |
| 2          | Control | 704                    | microgranuloma                                  | tubule epithelia regenerate, protein casts                        | lymphatic hyperplasia           | processing artefacts (vacuoles)  | NAD                             | histiocytic sarcoma | m                           | NAD               | 0              | 0                           | no                      | MODS                       |
| 3          | Control | 508                    | histiocytic sarcoma                             | tubule epithelia regenerate,                                      | histiocytic sarcoma             | NAD                              | NAD                             |                     | m                           | NAD               | 0              | 0                           | no                      | MODS                       |
| 4          | Control | 738                    | microgranuloma                                  | protein casts                                                     | NAD                             | NAD                              | bronchioalveolar adenoma        |                     | b                           | NAD               | 0              | < 1%                        | no                      | n.d.                       |
| 5          | Control | 747                    | histiocytic sarcoma, infarcts, congestion, LALT | histiocytic sarcoma                                               | histiocytic sarcoma, congestion | NAD                              | histiocytic sarcoma             |                     | m & s                       | NAD               | 0              | >1% < 3%                    | no                      | Liver failure              |
| 6          | Control | 750                    | LALT                                            | chronic nephritis, tubule epithelia regenerate, cysts             | NAD                             | processing artefacts (vacuoles)  | BALT                            |                     | 0                           | NAD               | 0              | < 1%                        | no                      | kidney failure             |
| 7          | Control | 768                    | biliary duct carcinoma, inflammation            | Glomerular sclerosis, tubule epithelia regenerates, protein casts | Lymphoma                        | NAD                              | NAD                             |                     | m & s                       | NAD               | 0              | 0                           | no                      | MODS                       |
| 8          | Control | 801                    | Lymphoma                                        | Lymphoma                                                          | Lymphoma                        | NAD                              | Lymphoma                        |                     | s                           | NAD               | 0              | < 1%                        | no                      | MODS                       |
| 9          | Control | 594                    | histiocytic sarcoma                             | histiocytic sarcoma                                               | Lymphoma                        | Meningeosis leukaemia            | Lymphoma                        |                     | m & s                       | NAD               | 0              | < 1%                        | no                      | MODS                       |
| 10         | Control | 859                    | LALT, slight inflammation                       | small abscesses                                                   | Hyperplasia                     | meningitis, encephalitis         | pneumonia                       |                     | 0                           | multiple infarcts | ~5%            | > 1% < 3%                   | no                      | MODS inf.                  |
| 11         | Control | 658                    | hepatocellular carcinoma                        | slight inflammation, tubule epithelia regenerate, scars           | NAD                             | NAD                              | histiocytic sarcoma,            |                     | m & s                       | NAD               | 0              | > 1% < 3%                   | no                      | MODS                       |
| 12         | Control | 869                    | Lymphoma                                        | Lymphoma, infarcts, glomerulosclerosis                            | Lymphoma                        | eosinophilic thalamic inclusions | Lymphoma, Thrombi               |                     | m & s                       | NAD               | 0              | > 1% < 3%                   | no                      | MODS                       |

|    |            |     |                                                  |                                                                         |                                   |                                   |                                                    |                                                  |       |                                                    |               |           |    |              |
|----|------------|-----|--------------------------------------------------|-------------------------------------------------------------------------|-----------------------------------|-----------------------------------|----------------------------------------------------|--------------------------------------------------|-------|----------------------------------------------------|---------------|-----------|----|--------------|
| 13 | Control    | 647 | mild amyloidosis                                 | mild amyloidosis                                                        | mild amyloidosis, siderosis       | pituitary adenoma, hydro-cephalus | atelectasis, aspi. Hair                            |                                                  | 0     | small myocardial infarcts                          | ~1%           | < 1%      | no | lung failure |
| 14 | Control    | 714 | mild activation of Kupffer cells                 | tubule epithelia regenerates, scars                                     | lymphatic hyperplasia             | NAD                               | lymphatic infiltrates in septae, infarcts          |                                                  | 0     | perivascular fibrosis, myxoid valves               | ~2%, ~5%      | > 2% < 5% | no | MODS inf.    |
| 15 | Control    | 737 | Lymphoma                                         | infarcts, subcapsular lymphoma infiltrates                              | Lymphoma                          | processing artefacts (vacuoles)   | Lymphoma, congestion                               | LN with central necrosis                         | m & s | small myocardial infarcts                          | ~3%           | > 2% < 5% | no | MODS         |
| 16 | Control    | 758 | mild activation of Kupffer cells, microgranuloma | subcapsular lymphoma infiltrates                                        | Lymphoma                          | slight encephalitis               | subpleural lymphoma infiltrates                    |                                                  | m & s | small myocardial infarcts + intramural infiltrates | ~1%; ~5%      | < 1%      | no | MODS         |
| 17 | Control    | 758 | histiocytic sarcoma,                             | histiocytic sarcoma, cysts                                              | histiocytic sarcoma,              | NAD                               | histiocytic sarcoma,                               |                                                  | m & s | NAD                                                | 0             | 0         | no | MODS         |
| 18 | Control    | 805 | Lymphoma, cholestasis                            | Lymphoma                                                                | Lymphoma, Siderosis               | slight encephalitis               | bronchioalveolar carcinoma with osseous metaplasia |                                                  | m & s | perivascular fibrosis                              | ~1%           | < 1%      | no | MODS         |
| 19 | 0.3 mM Spd | 696 | histiocytic sarcoma, atrophic parenchyma         | histiocytic sarcoma                                                     | lymphatic hyperplasia             | processing artefacts (vacuoles)   | histiocytic sarcoma                                |                                                  | m & s | NAD                                                | 0             | < 1%      | no | MODS         |
| 20 | 0.3 mM Spd | 768 | NAD                                              | KALT                                                                    | lymphatic hyperplasia, starry sky | NAD                               | papillary bronchioalveolar carcinoma               |                                                  | m     | NAD                                                | 0             | < 1%      | no | lung failure |
| 21 | 0.3 mM Spd | 820 | biliary duct carcinoma, inflammation             | protein casts, KALT                                                     | NAD                               | processing artefacts (vacuoles)   | NAD                                                |                                                  | m & s | NAD                                                | 0             | > 1% < 3% | no | MODS         |
| 22 | 0.3 mM Spd | 869 | inflammation, infarcts                           | chronic nephritis, tubule epithelia regenerate                          | lymphatic hyperplasia, starry sky | slight encephalitis               | congestion, inflammation                           |                                                  | 0     | small infarcts at septum,                          | ~1%           | > 1% < 3% | no | MODS inf.    |
| 23 | 0.3 mM Spd | 675 | Hepatitis                                        | slight nephritis,                                                       | lymphatic hyperplasia, starry sky | processing artefacts (vacuoles)   | bronchioalveolar carcinoma                         |                                                  | m     | intramural inflammation                            | ~3%           | > 1% < 3% | no | lung failure |
| 24 | 0.3 mM Spd | 696 | inflammatory infiltrates, mild amyloidosis       | chronic nephritis, tubule epithelia regenerate, scars, mild amyloidosis | Lymphoid hyperplasia, Amyloidosis | processing artefacts (vacuoles)   | infarcts                                           | sialadenitis, ulcer, histiocytic granuloma       | 0     | small myocardial infarcts, fibrosis, hypertrophy   | ~1%; ~3%; 30% | > 1% < 3% | no | MODS inf.    |
| 25 | 0.3 mM Spd | 716 | centrolobular necrosis, Kupffer cell activation  | tubule epithelia regenerates, KALT                                      | lymphatic hyperplasia             | processing artefacts (vacuoles)   | lymphatic infiltrates in septae                    | genital squamous cell carcinoma, bladderthrombus | m     | hypertrophy                                        | 30%           | > 1% < 3% | no | MODS inf.    |

|    |          |     |                                                      |                                                                      |                                   |                                  |                                                                 |                     |       |                           |        |           |    |                     |
|----|----------|-----|------------------------------------------------------|----------------------------------------------------------------------|-----------------------------------|----------------------------------|-----------------------------------------------------------------|---------------------|-------|---------------------------|--------|-----------|----|---------------------|
| 26 | 3 mM Spd | 479 | hepatocellular carcinoma, polyploidy, microgranuloma | chronic nephritis, tubule epithelia regenerate, scars                | lymphatic hyperplasia             | purulent meningitis              | granulocyte cluster infiltrates (metastatic pneumonia)          | histiocytic sarcoma | m & s | NAD                       | 0      | 0         | no | MODS                |
| 27 | 3 mM Spd | 704 | slight vacuolation                                   | KALT                                                                 | NAD                               | NAD                              | NAD                                                             |                     | 0     | NAD                       | 0      | < 1%      | no | n.d.                |
| 28 | 3 mM Spd | 715 | histiocytic sarcoma,                                 | protein casts                                                        | histiocytic sarcoma               | NAD                              | histiocytic sarcoma                                             |                     | m & s | NAD                       | 0      | 0         | no | MODS                |
| 29 | 3 mM Spd | 738 | atrophic parenchyma, microgranuloma                  | tubule epithelia regenerate, protein casts                           | lymphatic hyperplasia             | NAD                              | hemosiderosis, bleeding                                         |                     | 0     | small myocardial infarct  | ~1%    | < 1%      | no | n.d.                |
| 30 | 3 mM Spd | 738 | histiocytic sarcoma                                  | tubule epithelia regenerate                                          | histiocytic sarcoma               | processing artefacts (vacuoles)  | histiocytic sarcoma                                             |                     | m & s | NAD                       | 0      | 0         | no | MODS                |
| 31 | 3 mM Spd | 747 | hepatocellular carcinoma, polyploidy, microgranuloma | tubule epithelia regenerate, protein casts                           | Lymphoma                          | processing artefacts (vacuoles)  | NAD                                                             |                     | m & s | Hypertrophy               | 50%    | > 2% < 5% | no | MODS                |
| 32 | 3 mM Spd | 587 | Lymphoma, Amyloidosis                                | Lymphoma, Amyloidosis                                                | Lymphoma, Amyloidosis             | NAD                              | Lymphoma, Amyloidosis                                           |                     | m & s | NAD                       | 0      | 0         | no | MODS due to amyloid |
| 33 | 3 mM Spd | 801 | inflammation, LALT                                   | inflammation, KALT                                                   | lymphatic hyperplasia, starry sky | processing artefacts (vacuoles)  | NAD                                                             |                     | 0     | NAD                       | 0      | < 1%      | no | MODS inf.           |
| 34 | 3 mM Spd | 637 | histiocytic sarcoma,                                 | histiocytic sarcoma, tumorthrombi, infarcts                          | histiocytic sarcoma,              | hydro-cephalus                   | tumorthrombi                                                    |                     | m & s | Hypertrophy               | 30%    | > 2% < 5% | no | MODS                |
| 35 | 3 mM Spd | 647 | microgranuloma, polyploidy                           | chronic nephritis, tubule epithelia regenerate, protein casts, scars | lymphatic hyperplasia, starry sky | processing artefacts (vacuoles)  | congestion, histiocytic infiltrates, bronchioalveolar carcinoma |                     | m     | hypertrophy               | 30%    | 0         | no | lung failure        |
| 36 | 3 mM Spd | 703 | Lymphoma                                             | tubule epithelia regenerate, subcapsular lymphoma infiltrates        | Lymphoma                          | Meningeosis leukaemia            | Lymphoma                                                        |                     | m & s | perivascular fibrosis     | ~1%    | > 1% < 3% | no | MODS                |
| 37 | 3 mM Spd | 714 | cholangiofibrosis, lymphoma, infarcts                | lymphoma, tumorthrombi, infarcts                                     | Lymphoma                          | processing artefacts (vacuoles)  | Lymphoma, infarcts                                              |                     | m & s | Dilation                  | 20-30% | < 1%      | no | MODS                |
| 38 | 3 mM Spd | 779 | slight inflammation, cholestasis                     | Congestion                                                           | NAD                               | pituitary adenoma, hydrocephalus | NAD                                                             | Fibrosarcoma        | m     | small myocardial infarcts | ~3%    | > 1% < 3% | no | MODS                |

<sup>§</sup> According to "WHO International Classification of Rodent Tumors" (Ref. 89).

Abbreviations used: NAD, no abnormalities detected; LALT, liver-associated lymphatic tissue; KALT, kidney-associated lymphatic tissue; MODS, multiple-organ dysfunction; MODS inf., MODS due to generalized inflammation.



### Supplementary Table 5:

#### Left ventricular echocardiographic parameters of C57BL/6J aging mice.

Young (4M), middle-aged (18M) and aged (23M) controls were compared with aged *late-in-life* spermidine-treated (23M+S) C57BL/6J male mice (see Fig. 1a for the feeding scheme). Abbreviations: EF, ejection fraction; FS, fractional shortening; HR, heart rate; IVS, interventricular septum thickness during diastole; LV, left ventricular; LVEDD, left ventricular end-diastolic diameter; LVESD, left ventricular end-systolic diameter; PW, posterior wall thickness during diastole; RWT, relative wall thickness; TL, tibia length. Data show means  $\pm$  s.e.m. of indicated number of mice analysed per group.

|                           | Young                | Aged              |                   |                              |
|---------------------------|----------------------|-------------------|-------------------|------------------------------|
|                           | (4M)<br>N=10         | (18M)<br>N=14     | (23M)<br>N=20     | (23M+S)<br>N=20              |
| <b>Body weight (g)</b>    | 25.1 $\pm$ 0.5***    | 33.9 $\pm$ 0.8*** | 30 $\pm$ 0.6      | 30.2 $\pm$ 0.6               |
| <b>HR (bpm)</b>           | 572 $\pm$ 18         | 545 $\pm$ 16      | 538 $\pm$ 13      | 519 $\pm$ 17                 |
| <b>LV mass (mg)</b>       | 92 $\pm$ 3***        | 152 $\pm$ 6       | 153 $\pm$ 6       | 137 $\pm$ 4 <sup>§</sup>     |
| <b>LV mass/TL (mg/mm)</b> | 5.17 $\pm$ 0.17***   | 8.48 $\pm$ 0.35   | 8.73 $\pm$ 0.37   | 7.52 $\pm$ 0.22*             |
| <b>IVS (mm)</b>           | 0.80 $\pm$ 0.02***   | 1.04 $\pm$ 0.03   | 1.05 $\pm$ 0.03   | 0.99 $\pm$ 0.03              |
| <b>IVS/TL</b>             | 0.045 $\pm$ 0.001*** | 0.058 $\pm$ 0.001 | 0.06 $\pm$ 0.002  | 0.055 $\pm$ 0.002            |
| <b>PW (mm)</b>            | 0.73 $\pm$ 0.02***   | 0.89 $\pm$ 0.02   | 0.94 $\pm$ 0.03   | 0.86 $\pm$ 0.02 <sup>§</sup> |
| <b>PW/TL</b>              | 0.041 $\pm$ 0.001*** | 0.05 $\pm$ 0.001  | 0.054 $\pm$ 0.002 | 0.047 $\pm$ 0.001**          |
| <b>LVEDD (mm)</b>         | 3.57 $\pm$ 0.05**    | 3.99 $\pm$ 0.06   | 3.88 $\pm$ 0.06   | 3.88 $\pm$ 0.05              |
| <b>LVESD (mm)</b>         | 2.00 $\pm$ 0.10*     | 2.52 $\pm$ 0.07   | 2.33 $\pm$ 0.08   | 2.26 $\pm$ 0.07              |
| <b>RWT</b>                | 0.43 $\pm$ 0.01**    | 0.48 $\pm$ 0.01   | 0.52 $\pm$ 0.02   | 0.48 $\pm$ 0.01              |
| <b>FS (%)</b>             | 44 $\pm$ 2           | 37 $\pm$ 1        | 40 $\pm$ 1        | 42 $\pm$ 1                   |
| <b>EF (%)</b>             | 76 $\pm$ 2           | 67 $\pm$ 2        | 71 $\pm$ 2        | 73 $\pm$ 1                   |

\*\*\*p<0.001, \*\*p<0.01, \*p<0.05 vs. 23M (ANOVA with post-hoc Tukey or Welch's test with post-hoc Games-Howell according to equality of variances)

<sup>§</sup>p<0.05 vs. 23M (unpaired Student's *t*-test comparing 23M+S vs. 23M)

## Supplementary Table 6:

### Left ventricular hemodynamic parameters of C57BL/6J aging mice.

Young (4M), middle-aged (18M) and aged (24M) controls were compared with aged *late-in-life* spermidine-treated (24M+S) C57BL/6J male mice (see Fig. 1a for the feeding schemes). Abbreviations: CO, cardiac output;  $dP/dt_{max}$ , peak rate of pressure rise;  $dP/dt_{min}$ , peak rate of pressure decay;  $E_a$ , arterial elastance; EF, ejection fraction; ESP, end-systolic pressure; EDP, end-diastolic pressure; ESV, end-systolic volume; EDV, end-diastolic volume; HR, heart rate;  $P_{max}$ , maximum ventricular pressure; SV, stroke volume;  $\tau$ , left ventricular pressure decay time constant (according to Weiss' Method); VVC, ventricular-vascular coupling; EDPVR  $\beta$ , Exponential end-diastolic pressure-volume relationship chamber stiffness constant; ESPVR Ees, Linear end-systolic pressure-volume relationship slope. Data show means  $\pm$  s.e.m. or median [IQR] (according to normality) of indicated number of mice analyzed per group.

|                           | Young                        | Aged              |                   |                            |
|---------------------------|------------------------------|-------------------|-------------------|----------------------------|
|                           | (4M)<br>N=10                 | (18M)<br>N=8      | (24M)<br>N=10     | (24M+S)<br>N=10            |
| HR (bpm)                  | 505 $\pm$ 10*                | 502 $\pm$ 20      | 457 $\pm$ 12      | 476 $\pm$ 26               |
| EF (%)                    | 76 $\pm$ 3                   | 66 $\pm$ 2        | 70 $\pm$ 1        | 71 $\pm$ 2                 |
| CO (ml/min)               | 20.8 [20.4-21]               | 23 [20.8-26.1]    | 20.2 [19.6-23.4]  | 23.9 [20.6-25]             |
| SV ( $\mu$ l)             | 40.4 $\pm$ 0.9**             | 45.2 $\pm$ 1.7    | 47 $\pm$ 1.1      | 48.1 $\pm$ 1.5             |
| ESV ( $\mu$ l)            | 12.9 $\pm$ 1.6**             | 24.1 $\pm$ 2.2    | 20.9 $\pm$ 1.5    | 20.1 $\pm$ 1.6             |
| EDV ( $\mu$ l)            | 53.3 $\pm$ 1.6***            | 69.3 $\pm$ 2.8    | 67.8 $\pm$ 2.3    | 68.2 $\pm$ 2.1             |
| $P_{max}$ (mmHg)          | 68 $\pm$ 2*                  | 69 $\pm$ 3        | 56 $\pm$ 3        | 59 $\pm$ 5                 |
| ESP (mmHg)                | 56 $\pm$ 2                   | 61 $\pm$ 2        | 50 $\pm$ 3        | 50 $\pm$ 4                 |
| EDP (mmHg)                | 3.3 $\pm$ 0.4 <sup>#</sup>   | 4.6 $\pm$ 0.3     | 5.2 $\pm$ 0.7     | 3.3 $\pm$ 0.5 <sup>#</sup> |
| $E_a$ (mmHg/ $\mu$ l)     | 1.39 $\pm$ 0.06**            | 1.37 $\pm$ 0.06*  | 1.06 $\pm$ 0.06   | 1.06 $\pm$ 0.09            |
| $dP/dt_{max}$ (mmHg/s)    | 3298 $\pm$ 130               | 3825 $\pm$ 332*   | 2580 $\pm$ 261    | 3131 $\pm$ 381             |
| $dP/dt_{min}$ (mmHg/s)    | -3445 $\pm$ 177 <sup>#</sup> | -3528 $\pm$ 291*  | -2396 $\pm$ 255   | -2803 $\pm$ 372            |
| $\tau$ (ms)               | 6.9 $\pm$ 0.3*               | 7.7 $\pm$ 0.7     | 10.6 $\pm$ 1.3    | 8.1 $\pm$ 0.8 <sup>§</sup> |
| VVC                       | 1.45 $\pm$ 0.18              | 1.07 $\pm$ 0.17   | 1.02 $\pm$ 0.1    | 1.63 $\pm$ 0.19*           |
| ESPVR Ees (mmHg/ $\mu$ l) | 2.05 $\pm$ 0.31*             | 1.51 $\pm$ 0.26   | 1.06 $\pm$ 0.1    | 1.76 $\pm$ 0.28            |
| EDPVR $\beta$ ( $\mu$ l)  | 0.023 $\pm$ 0.004*           | 0.025 $\pm$ 0.004 | 0.049 $\pm$ 0.009 | 0.031 $\pm$ 0.003**        |

\*\*\* $p$ <0.001, \*\* $p$ <0.01, \* $p$ <0.05, <sup>#</sup> $p$ <0.055 vs. 24M (ANOVA with post-hoc Tukey, Welch's test with post-hoc Games-Howell or Kruskal-Wallis followed by corrected multiple comparisons by Mann-Whitney U-test according to normality and equality of variances. For details, please refer to Methods section). <sup>§</sup> $p$ <0.05 vs. 24M (unpaired Student's  $t$ -test comparing 24M+S vs. 24M)

Note: for ESPVR Ees and EDPVR  $\beta$ , other parameters in the fitting equation ( $V_0$  and  $\alpha$ , respectively) were included as covariates using ANCOVA and post-hocs were Bonferroni-corrected.

## Supplementary Table 7:

### Gravimetric analysis of C57BL/6J aging mice.

Young (4M), middle-aged (18M) and aged (24M) controls were compared with aged *late-in-life* spermidine-treated (24M+S) C57BL/6J male mice (see Fig. 1a for the feeding scheme). Abbreviations: BAT, brown adipose tissue; WAT, white adipose tissue; TL, tibia length. Data show means  $\pm$  s.e.m. of indicated number of mice analyzed per group.

|                          | Young            | Aged              |                |                            |
|--------------------------|------------------|-------------------|----------------|----------------------------|
|                          | (4M)<br>N=10     | (18M)<br>N=8      | (24M)<br>N=10  | (24M+S)<br>N=10            |
| Body weight (g)          | 28.2 $\pm$ 0.6   | 35.1 $\pm$ 1**    | 30.6 $\pm$ 1   | 29.3 $\pm$ 0.7             |
| Heart weight (HW, mg)    | 136 $\pm$ 6***   | 194 $\pm$ 10      | 200 $\pm$ 12   | 191 $\pm$ 9                |
| HW/TL (mg/mm)            | 7.7 $\pm$ 0.4*** | 10.9 $\pm$ 0.6    | 11.2 $\pm$ 0.7 | 10.8 $\pm$ 0.5             |
| Lung weight (mg)         | 157 $\pm$ 4**    | 168 $\pm$ 8       | 187 $\pm$ 3    | 166 $\pm$ 6*               |
| Lung weight/TL (mg/mm)   | 8.8 $\pm$ 0.3**  | 9.4 $\pm$ 0.5     | 10.5 $\pm$ 0.2 | 9.4 $\pm$ 0.3 <sup>§</sup> |
| Kidney weight (mg)       | 336 $\pm$ 11     | 433 $\pm$ 5***    | 279 $\pm$ 21   | 295 $\pm$ 25               |
| Kidney weight/TL (mg/mm) | 18.9 $\pm$ 0.8   | 24.3 $\pm$ 0.4*** | 15.7 $\pm$ 1.3 | 16.8 $\pm$ 1.5             |
| Liver weight (mg)        | 1376 $\pm$ 82*   | 1606 $\pm$ 114    | 1688 $\pm$ 82  | 1651 $\pm$ 65              |
| Liver weight/TL (mg/mm)  | 77.7 $\pm$ 5.1   | 90.4 $\pm$ 6.9    | 94.3 $\pm$ 4.2 | 93.5 $\pm$ 3.4             |
| Spleen weight (mg)       | 80 $\pm$ 8***    | 102 $\pm$ 8       | 156 $\pm$ 19   | 159 $\pm$ 16               |
| WAT (mg)                 | 347 $\pm$ 33**   | 1057 $\pm$ 185**  | 165 $\pm$ 16   | 177 $\pm$ 14               |
| BAT (mg)                 | 64 $\pm$ 2       | 85 $\pm$ 11       | 59 $\pm$ 7     | 50 $\pm$ 5                 |

\*\*\*p<0.001, \*\*p<0.01, \*p<0.05 vs. 24M (ANOVA with post-hoc Tukey or Welch's test with post-hoc Games-Howell according to equality of variances)

<sup>§</sup>p<0.05 vs. 24M (unpaired Student's *t*-test comparing 24M+S vs. 24M)

## Supplementary Table 8:

### Left ventricular morphology of C57BL/6J aging mice.

Young (4M) and aged (24M) controls were compared with aged *late-in-life* spermidine-treated (24M+S) C57BL/6J male mice (see Fig. 1a for the feeding scheme) using design-based stereology. Data show means  $\pm$  s.d. of indicated number of mice analyzed per group.  $V_V(\text{structure/reference volume})$ , relative volumes calculated as the fractions of indicated reference volumes.  $V(\text{structure, volume})$ , absolute volumes given in  $\text{mm}^3$ . Abbreviations used: myo, myocytes; lv, left ventricle; int, interstitium; coll, collagen; lum, vessel lumina; wall, vessel wall; lg, lipofuscin granules; nuc, nuclei; mf, myofibrils; mi, mitochondria; sp, (mitochondria- and myofibril-free) sarcoplasm.

|                                           | Young                          | Aged                |                      |
|-------------------------------------------|--------------------------------|---------------------|----------------------|
|                                           | (4M)<br>N=10                   | (24M)<br>N=15       | (24M+S)<br>N=14-15   |
| $V_V(\text{myo/lv})$                      | 0.873 $\pm$ 0.034***           | 0.762 $\pm$ 0.069   | 0.752 $\pm$ 0.058    |
| $V_V(\text{int/lv})$                      | 0.127 $\pm$ 0.034***           | 0.238 $\pm$ 0.069   | 0.248 $\pm$ 0.058    |
| $V(\text{myo,lv})$                        | 71.2 $\pm$ 6.25*               | 86.3 $\pm$ 16.7     | 87.4 $\pm$ 10.3      |
| $V(\text{int,lv})$                        | 10.3 $\pm$ 2.56***             | 26.8 $\pm$ 8.6      | 29.1 $\pm$ 8.6       |
| $V_V(\text{coll/int})$                    | 0.006 [0.005-0.007]            | 0.013 [0.007-0.017] | 0.02 [0.008-0.025]   |
| $V_V(\text{lum/int})$                     | 0.284 [0.259-0.309]            | 0.238 [0.187-0.281] | 0.206 [0.185-0.251]  |
| $V_V(\text{wall/lv})$                     | 0.199 $\pm$ 0.048              | 0.104 $\pm$ 0.028   | 0.119 $\pm$ 0.022    |
| $V(\text{coll,lv})$                       | 0.069 $\pm$ 0.038**            | 0.339 $\pm$ 0.267   | 0.501 $\pm$ 0.328    |
| $V(\text{lum,lv})$                        | 2.97 $\pm$ 1.20**              | 6.34 $\pm$ 2.85     | 6.35 $\pm$ 1.62      |
| $V(\text{wall,lv})$                       | 1.91 [1.71-2.23]*              | 2.4 [2.15-2.96]     | 3.4 [2.74-3.77]*     |
| $V_V(\text{lg/myo})$ [ $\times 10^{-3}$ ] | 0.041 $\pm$ 0.086 <sup>†</sup> | 0.807 $\pm$ 0.424   | 1.190 $\pm$ 0.919    |
| $V(\text{lg,lv})$                         | 0.003 $\pm$ 0.006 <sup>†</sup> | 0.070 $\pm$ 0.039   | 0.105 $\pm$ 0.083    |
| $V_V(\text{nuc/myo})$                     | 0.021 $\pm$ 0.005              | 0.022 $\pm$ 0.008   | 0.021 $\pm$ 0.007    |
| $V_V(\text{mf/myo})$                      | 0.543 $\pm$ 0.023*             | 0.505 $\pm$ 0.039   | 0.554 $\pm$ 0.038*** |
| $V_V(\text{mi/myo})$                      | 0.347 $\pm$ 0.015***           | 0.276 $\pm$ 0.028   | 0.325 $\pm$ 0.024*** |
| $V_V(\text{sp/myo})$                      | 0.088 $\pm$ 0.010***           | 0.197 $\pm$ 0.054   | 0.099 $\pm$ 0.027*** |
| $V(\text{nuc,lv})$                        | 1.52 $\pm$ 0.37                | 1.83 $\pm$ 0.645    | 1.87 $\pm$ 0.68      |
| $V(\text{mf,lv})$                         | 38.7 $\pm$ 4.46                | 43.5 $\pm$ 8.66     | 48.3 $\pm$ 5.47      |
| $V(\text{mi,lv})$                         | 24.7 $\pm$ 2.04                | 23.6 $\pm$ 3.85     | 28.5 $\pm$ 4.33**    |
| $V(\text{sp,lv})$                         | 6.27 [5.77-6.7]***             | 17.29 [13.53-18.13] | 8.39 [6.88-10.48]*** |

<sup>†</sup>Note that lipofuscin granules (lg) were only detectable in 2 out of 10 young (4M) subjects, rendering this data impossible to analyze by general linear statistical models. Therefore, the aged groups (24M vs. 24M+S) were compared by Student's t-test yielding no significant differences.

\*\*\*p<0.001, \*\*p<0.01, \*p<0.05 vs. 24M (ANOVA with post-hoc Tukey, Welch's test with post-hoc Games-Howell or Kruskal-Wallis followed by corrected multiple comparisons by Mann-Whitney U-test according to normality and equality of variances. For details, please refer to Methods section).

### Supplementary Table 9:

**Functional classification of cardiac tissue protein abundance affected by spermidine.** Spermidine was supplemented *late-in-life* to aging C57BL/6J male mice until age 24M (see Fig. 1a for the feeding scheme) and cardiac proteomic profiles from spermidine-fed animals were compared with age-matched controls (compare Supplementary Fig. 6b). Over-represented gene ontology (GO) terms ( $p < 0.05$  uncorrected, selected GO's are presented) were identified by *PANTHER*<sup>90</sup> (release 20150430).

| GO (category)                                  | Genes                                              |
|------------------------------------------------|----------------------------------------------------|
| Complement activation (BP)                     | C4b, Serping1, C3, C5                              |
| Myosin filament (CC)                           | Myh6/7, Myh4, Myh10, Myh11                         |
| Mitochondrial respiratory chain complex I (CC) | Ndutfb5, Ndutfb7, Ndutfb8, Ndutfb9, Ndufs3, Ndufs6 |

### Supplementary Table 10:

**Functional classification of differentially expressed genes in cardiac tissue by spermidine.** Spermidine was supplemented *life-long* to aging female mice (see Fig. 1a for the feeding scheme) until age 30-32 month and cardiac transcriptomic profiles from spermidine-fed animals were compared with age-matched controls (compare Supplementary Fig. 6a). Over-represented gene ontology (GO) terms were identified by Ingenuity Pathway Analysis (IPA).

| GO                    | Genes                                                                       |
|-----------------------|-----------------------------------------------------------------------------|
| Infection of mammalia | Cd274, Cxcl10, Igtp, ligp1, Irgm, Stat1                                     |
| Leukocyte migration   | Cd274, Cxcl10, Defb8, Fgf2, Irgm, Serpina1, Stat1, Tfpi                     |
| Cell movement         | Cap1, Cxcl10, Defb8, Fgf2, Gfra1, Golga2, Irgm, Ldhc, Serpina1, Stat1, Tfpi |
| Cellular homeostasis  | Aga, Aspscr1, Cd274, Fgf2, Igtp, ligp1, Irgm, Serpina1, Stat1               |

## Supplementary Table 11:

### Left ventricular echocardiographic parameters of *Atg5*-transgenic mice.

Control and spermidine-treated *Atg5<sup>flox/flox</sup>/MLC2a-Cre<sup>-</sup> (Atg5<sup>+/+</sup>)* and *Atg5<sup>flox/flox</sup>/MLC2a-Cre<sup>+</sup> (Atg5<sup>-/-</sup>)* male mice at the age of 13-14 weeks were used (see Supplementary Fig. 10a for the feeding scheme). Abbreviations: EF, ejection fraction; FS, fractional shortening; HR, heart rate; IVS, interventricular septum thickness during diastole; LV, left ventricular; LVEDD, left ventricular end-diastolic diameter; LVESD, left ventricular end-systolic diameter; PW, posterior wall thickness during diastole; RWT, relative wall thickness; TL, tibia length. Data show means  $\pm$  s.e.m. of indicated number of mice analyzed per group.

|                           | <i>Atg5<sup>+/+</sup></i> |                      | <i>Atg5<sup>-/-</sup></i> |                                   | Two-way ANOVA<br>(p-values) |                |                  |
|---------------------------|---------------------------|----------------------|---------------------------|-----------------------------------|-----------------------------|----------------|------------------|
|                           | Control<br>(N=16)         | Spermidine<br>(N=15) | Control<br>(N=12)         | Spermidine<br>(N=14)              | Geno-<br>type               | Treat-<br>ment | Inter-<br>action |
| <b>Body weight (g)</b>    | 26.8 $\pm$ 0.6            | 26.8 $\pm$ 0.5       | 25.4 $\pm$ 0.7            | 27.7 $\pm$ 0.6*                   | n.s.                        | 0.052          | n.s.             |
| <b>HR (bpm)</b>           | 558 $\pm$ 14              | 567 $\pm$ 13         | 535 $\pm$ 9               | 559 $\pm$ 16                      | n.s.                        | n.s.           | n.s.             |
| <b>LV mass (mg)</b>       | 116 $\pm$ 5               | 104 $\pm$ 3          | 121 $\pm$ 5               | 139 $\pm$ 8 <sup>+++,*</sup>      | 0.001                       | n.s.           | 0.008            |
| <b>LV mass/TL (mg/mm)</b> | 6.65 $\pm$ 0.29           | 5.84 $\pm$ 0.17*     | 6.86 $\pm$ 0.3            | 7.94 $\pm$ 0.43 <sup>+++,*</sup>  | <0.001                      | n.s.           | 0.004            |
| <b>IVS (mm)</b>           | 0.87 $\pm$ 0.02           | 0.86 $\pm$ 0.02      | 0.86 $\pm$ 0.03           | 0.97 $\pm$ 0.03 <sup>++,**</sup>  | 0.055                       | n.s.           | 0.016            |
| <b>IVS/TL</b>             | 0.05 $\pm$ 0.001          | 0.05 $\pm$ 0.001     | 0.05 $\pm$ 0.002          | 0.06 $\pm$ 0.002 <sup>++,*</sup>  | 0.03                        | n.s.           | 0.007            |
| <b>PW (mm)</b>            | 0.81 $\pm$ 0.02           | 0.76 $\pm$ 0.02      | 0.83 $\pm$ 0.02           | 0.89 $\pm$ 0.02 <sup>+++</sup>    | <0.001                      | n.s.           | 0.013            |
| <b>PW/TL</b>              | 0.05 $\pm$ 0.001          | 0.04 $\pm$ 0.001*    | 0.05 $\pm$ 0.001          | 0.05 $\pm$ 0.002 <sup>+++,*</sup> | <0.001                      | n.s.           | 0.002            |
| <b>LVEDD (mm)</b>         | 3.8 $\pm$ 0.05            | 3.67 $\pm$ 0.04      | 3.87 $\pm$ 0.08           | 3.84 $\pm$ 0.06 <sup>+</sup>      | 0.004                       | n.s.           | n.s.             |
| <b>LVESD (mm)</b>         | 2.22 $\pm$ 0.09           | 2.08 $\pm$ 0.06      | 2.34 $\pm$ 0.08           | 2.43 $\pm$ 0.08 <sup>++</sup>     | 0.005                       | n.s.           | n.s.             |
| <b>RWT</b>                | 0.78 $\pm$ 0.04           | 0.79 $\pm$ 0.03      | 0.74 $\pm$ 0.03           | 0.78 $\pm$ 0.03                   | n.s.                        | n.s.           | n.s.             |
| <b>FS (%)</b>             | 41.7 $\pm$ 1.7            | 43.5 $\pm$ 1.2       | 39.6 $\pm$ 1.2            | 37 $\pm$ 1.1 <sup>++</sup>        | 0.003                       | n.s.           | n.s.             |
| <b>EF (%)</b>             | 73 $\pm$ 2                | 75 $\pm$ 2           | 71 $\pm$ 1                | 67 $\pm$ 2 <sup>++</sup>          | 0.005                       | n.s.           | n.s.             |

\*\*\*p<0.001, \*\*p<0.01, \*p<0.05 vs. respective genotype-matched control (Simple main effects following significant two-way ANOVA)

+++p<0.001, ++p<0.01, +p<0.05 vs. respective treatment-matched *Atg5<sup>+/+</sup>* (Simple main effects following significant two-way ANOVA)

## Supplementary Table 12:

### Left ventricular hemodynamic parameters of *Atg5*-transgenic mice.

Control and spermidine-treated *Atg5<sup>flox/flox</sup>/MLC2a-Cre<sup>-</sup> (Atg5<sup>+/+</sup>)* and *Atg5<sup>flox/flox</sup>/MLC2a-Cre<sup>+</sup> (Atg5<sup>-/-</sup>)* male mice at the age of 16 weeks were used (see Supplementary Fig. 10a for the feeding scheme). Abbreviations: CO, cardiac output;  $dP/dt_{max}$ , peak rate of pressure rise;  $dP/dt_{min}$ , peak rate of pressure decay;  $E_a$ , arterial elastance; EF, ejection fraction; ESP, end-systolic pressure; EDP, end-diastolic pressure; ESV, end-systolic volume; EDV, end-diastolic volume; HR, heart rate;  $P_{max}$ , maximum ventricular pressure; SV, stroke volume;  $\tau$ , left ventricular pressure decay time constant (according to Weiss' Method); VVC, ventricular-vascular coupling; EDPVR  $\beta$ , Exponential end-diastolic pressure-volume relationship chamber stiffness constant; ESPVR  $E_{es}$ , Linear end-systolic pressure-volume relationship slope. Data show means  $\pm$  s.e.m. of indicated number of mice analyzed per group.

|                                                               | <i>Atg5<sup>+/+</sup></i> |                              | <i>Atg5<sup>-/-</sup></i> |                                | Two-way ANOVA<br>(p-values) |                |                  |
|---------------------------------------------------------------|---------------------------|------------------------------|---------------------------|--------------------------------|-----------------------------|----------------|------------------|
|                                                               | Control<br>(N=10)         | Spermidine<br>(N=10)         | Control<br>(N=9)          | Spermidine<br>(N=11)           | Geno-<br>type               | Treat-<br>ment | Inter-<br>action |
| <b>HR (bpm)</b>                                               | 477 $\pm$ 12              | 472 $\pm$ 16                 | 464 $\pm$ 7               | 464 $\pm$ 12                   | n.s.                        | n.s.           | n.s.             |
| <b>EF (%)</b>                                                 | 76 $\pm$ 2                | 76 $\pm$ 1                   | 74 $\pm$ 1                | 70 $\pm$ 1 <sup>+++*</sup>     | 0.002                       | n.s.           | 0.051            |
| <b>CO (ml/min)</b>                                            | 21 $\pm$ 0.7              | 20.2 $\pm$ 1.1               | 20.5 $\pm$ 0.7            | 19.4 $\pm$ 0.6                 | n.s.                        | n.s.           | n.s.             |
| <b>SV (<math>\mu</math>l)</b>                                 | 44.1 $\pm$ 1.1            | 42.8 $\pm$ 1.3               | 44.3 $\pm$ 1.7            | 41.8 $\pm$ 0.6                 | n.s.                        | n.s.           | n.s.             |
| <b>ESV (<math>\mu</math>l)</b>                                | 14.3 $\pm$ 1.4            | 13.2 $\pm$ 0.4               | 15.3 $\pm$ 0.8            | 18.4 $\pm$ 1 <sup>+++*</sup>   | 0.004                       | n.s.           | 0.045            |
| <b>EDV (<math>\mu</math>l)</b>                                | 58.4 $\pm$ 2              | 56 $\pm$ 1.5                 | 59.7 $\pm$ 1.6            | 60.2 $\pm$ 1.2                 | n.s.                        | n.s.           | n.s.             |
| <b><math>P_{max}</math></b>                                   | 73 $\pm$ 3                | 74 $\pm$ 4                   | 74 $\pm$ 6                | 81 $\pm$ 1                     | n.s.                        | n.s.           | n.s.             |
| <b>ESP (mmHg)</b>                                             | 60 $\pm$ 3                | 64 $\pm$ 4                   | 65 $\pm$ 6                | 70 $\pm$ 2                     | n.s.                        | n.s.           | n.s.             |
| <b>EDP (mmHg)</b>                                             | 4.4 $\pm$ 0.7             | 4.3 $\pm$ 0.5                | 4.6 $\pm$ 1.1             | 5.1 $\pm$ 0.5                  | n.s.                        | n.s.           | n.s.             |
| <b><math>E_a</math> (mm<br/>Hg/<math>\mu</math>l)</b>         | 1.38 $\pm$ 0.07           | 1.51 $\pm$ 0.11              | 1.46 $\pm$ 0.13           | 1.68 $\pm$ 0.05                | n.s.                        | n.s.           | n.s.             |
| <b><math>dP/dt_{max}</math><br/>(mmHg/s)</b>                  | 4048 $\pm$ 398            | 4331 $\pm$ 450               | 4371 $\pm$ 688            | 4798 $\pm$ 462                 | n.s.                        | n.s.           | n.s.             |
| <b><math>dP/dt_{min}</math><br/>(mmHg/s)</b>                  | -3787 $\pm$ 308           | -4085 $\pm$ 417              | -3913 $\pm$ 554           | -4445 $\pm$ 309                | n.s.                        | n.s.           | n.s.             |
| <b><math>\tau</math> (ms)</b>                                 | 6.8 $\pm$ 0.3             | 7.4 $\pm$ 0.4                | 8.1 $\pm$ 0.8             | 6.9 $\pm$ 0.4                  | n.s.                        | n.s.           | n.s.             |
| <b>VVC</b>                                                    | 1.18 $\pm$ 0.23           | 1.63 $\pm$ 0.23*             | 0.83 $\pm$ 0.1            | 0.81 $\pm$ 0.05 <sup>+++</sup> | 0.002                       | n.s.           | n.s.             |
| <b>ESPVR <math>E_{es}</math><br/>(mmHg/<math>\mu</math>l)</b> | 1.63 $\pm$ 0.30           | 2.33 $\pm$ 0.27 <sup>†</sup> | 1.24 $\pm$ 0.20           | 1.35 $\pm$ 0.09 <sup>†</sup>   | 0.048                       | n.s.           | n.s.             |
| <b>EDPVR <math>\beta</math> (<math>\mu</math>l)</b>           | 0.020 $\pm$ 0.002         | 0.020 $\pm$ 0.002            | 0.021 $\pm$ 0.003         | 0.039 $\pm$ 0.005*             | n.s.                        | n.s.           | 0.045            |

\*\*\* $p$ <0.001, \*\* $p$ <0.01, \* $p$ <0.05 and  $\dagger p$  = 0.054 vs. respective genotype-matched control (Simple main effects following significant two-way ANOVA)

+++ $p$ <0.001, ++ $p$ <0.01, + $p$ <0.05 vs. respective treatment-matched *Atg5<sup>+/+</sup>* (Simple main effects following significant two-way ANOVA)

Note: for ESPVR  $E_{es}$  and EDPVR  $\beta$ , other parameters in the fitting equation ( $V_0$  and  $\alpha$ , respectively) were included as covariates using ANCOVA.

### Supplementary Table 13:

#### Gravimetric analysis of *Atg5*-transgenic mice.

Control and spermidine-treated *Atg5<sup>flox/flox</sup>/MLC2a-Cre<sup>-</sup> (Atg5<sup>+/+</sup>)* and *Atg5<sup>flox/flox</sup>/MLC2a-Cre<sup>+</sup> (Atg5<sup>-/-</sup>)* male mice at the age of 16 weeks were used (see Supplementary Fig. 10a for the feeding scheme). Abbreviations: BAT, brown adipose tissue; WAT, white adipose tissue; TL, tibia length. Data show means  $\pm$  s.e.m. of indicated number of mice analyzed per group.

|                                         | <i>Atg5<sup>+/+</sup></i> |                      | <i>Atg5<sup>-/-</sup></i> |                      | Two-way ANOVA<br>(p-values) |                |                  |
|-----------------------------------------|---------------------------|----------------------|---------------------------|----------------------|-----------------------------|----------------|------------------|
|                                         | Control<br>(N=10)         | Spermidine<br>(N=10) | Control<br>(N=9)          | Spermidine<br>(N=11) | Geno-<br>type               | Treat-<br>ment | Inter-<br>action |
| <b>Body weight (g)</b>                  | 27.4 $\pm$ 0.8            | 28.1 $\pm$ 0.9       | 26.5 $\pm$ 0.5            | 28.5 $\pm$ 0.7       | n.s.                        | n.s.           | n.s.             |
| <b>Heart weight<br/>(HW, mg)</b>        | 144 $\pm$ 9               | 144 $\pm$ 5          | 147 $\pm$ 7               | 154 $\pm$ 6          | n.s.                        | n.s.           | n.s.             |
| <b>HW/TL<br/>(mg/mm)</b>                | 8.17 $\pm$ 0.48           | 8.09 $\pm$ 0.27      | 8.43 $\pm$ 0.38           | 8.79 $\pm$ 0.3       | n.s.                        | n.s.           | n.s.             |
| <b>Lung weight<br/>(mg)</b>             | 144 $\pm$ 8               | 154 $\pm$ 6          | 144 $\pm$ 7               | 160 $\pm$ 6          | n.s.                        | n.s.           | n.s.             |
| <b>Lung weight/TL<br/>(mg/mm)</b>       | 8.18 $\pm$ 0.49           | 8.68 $\pm$ 0.32      | 8.23 $\pm$ 0.36           | 9.11 $\pm$ 0.3       | n.s.                        | n.s.           | n.s.             |
| <b>Kidney weight<br/>(mg)</b>           | 326 $\pm$ 17              | 341 $\pm$ 8          | 317 $\pm$ 8               | 321 $\pm$ 10         | n.s.                        | n.s.           | n.s.             |
| <b>Kidney<br/>weight/TL<br/>(mg/mm)</b> | 18.51 $\pm$ 0.87          | 19.22 $\pm$ 0.52     | 18.1 $\pm$ 0.42           | 18.35 $\pm$ 0.51     | n.s.                        | n.s.           | n.s.             |
| <b>Liver weight (g)</b>                 | 1268 $\pm$ 76             | 1283 $\pm$ 70        | 1194 $\pm$ 37             | 1378 $\pm$ 67        | n.s.                        | n.s.           | n.s.             |
| <b>Liver weight/TL<br/>(mg/mm)</b>      | 71.98 $\pm$ 3.82          | 71.2 $\pm$ 3.7       | 68.29 $\pm$ 2.13          | 78.68 $\pm$ 3.74     | n.s.                        | n.s.           | n.s.             |
| <b>Spleen weight<br/>(mg)</b>           | 77 $\pm$ 6                | 79 $\pm$ 6           | 69 $\pm$ 2                | 75 $\pm$ 5           | n.s.                        | n.s.           | n.s.             |
| <b>WAT (mg)</b>                         | 455 $\pm$ 69              | 362 $\pm$ 24         | 450 $\pm$ 65              | 550 $\pm$ 74         | n.s.                        | n.s.           | n.s.             |
| <b>BAT (mg)</b>                         | 63 $\pm$ 5                | 68 $\pm$ 6           | 62 $\pm$ 11               | 68 $\pm$ 6           | n.s.                        | n.s.           | n.s.             |



## Supplementary Table 14:

### Left ventricular echocardiographic parameters of *Dahl* salt-sensitive rats.

Control and spermidine-treated *Dahl* salt-sensitive rats fed a high-salt diet (8% NaCl) starting from the age of 7 weeks (see Fig. 4a for the feeding scheme) were used at the indicated ages. Abbreviations: E/E', peak early filling Doppler velocity of transmitral flow (E) to the corresponding myocardial tissue Doppler velocity (E') ratio; EF, ejection fraction; FS, fractional shortening; HR, heart rate; IVS, interventricular septum thickness during diastole; RWT, relative wall thickness; LA, left atrium; LV, left ventricular; LVEDD, left ventricular end-diastolic diameter; LVESD, left ventricular end-systolic diameter; PW, left ventricular posterior wall thickness during diastole. Data show means  $\pm$  s.e.m. of indicated number of rats analyzed per group.

|                                   | 9-week-old<br>(2 weeks high-salt) |                            | 14-week-old<br>(7 weeks high-salt) |                                   | 19-week-old<br>(12 weeks high-salt) |                                   | Two-way ANOVA<br>(p-values <sup>§</sup> ) |           |             |
|-----------------------------------|-----------------------------------|----------------------------|------------------------------------|-----------------------------------|-------------------------------------|-----------------------------------|-------------------------------------------|-----------|-------------|
|                                   | Control<br>(N=10)                 | Spermidine<br>(N=10)       | Control<br>(N=10)                  | Spermidine<br>(N=10)              | Control<br>(N=10)                   | Spermidine<br>(N=10)              | Age                                       | Treatment | Interaction |
| <b>Body weight (g)</b>            | 300 $\pm$ 4                       | 268 $\pm$ 3 <sup>***</sup> | 371 $\pm$ 5 <sup>***</sup>         | 341 $\pm$ 5 <sup>***, +</sup>     | 360 $\pm$ 11 <sup>***</sup>         | 389 $\pm$ 11                      | <0.001                                    | n.s.      | <0.001      |
| <b>HR (bpm)</b>                   | 377 $\pm$ 6                       | 387 $\pm$ 6                | 375 $\pm$ 5                        | 378 $\pm$ 6                       | 371 $\pm$ 5                         | 376 $\pm$ 4                       | n.s.                                      | n.s.      | n.s.        |
| <b>LV mass (mg)</b>               | 1304 $\pm$ 29                     | 1231 $\pm$ 36              | 1762 $\pm$ 66 <sup>***</sup>       | 1404 $\pm$ 44 <sup>***, +</sup>   | 2053 $\pm$ 85 <sup>***</sup>        | 1719 $\pm$ 55 <sup>***, +</sup>   | <0.001                                    | <0.001    | 0.02        |
| <b>LV mass/body weight (mg/g)</b> | 4.36 $\pm$ 0.13                   | 4.60 $\pm$ 0.16            | 4.75 $\pm$ 0.17                    | 4.11 $\pm$ 0.1 <sup>***, +</sup>  | 5.70 $\pm$ 0.15 <sup>***</sup>      | 4.43 $\pm$ 0.14 <sup>***</sup>    | <0.001                                    | <0.001    | <0.001      |
| <b>LA area (mm<sup>2</sup>)</b>   | 22.3 $\pm$ 1                      | 21.8 $\pm$ 0.9             | 27.9 $\pm$ 0.8 <sup>***</sup>      | 26.8 $\pm$ 0.6 <sup>+</sup>       | 27.7 $\pm$ 1.3 <sup>***</sup>       | 24.2 $\pm$ 0.7 <sup>*</sup>       | <0.001                                    | 0.01      | n.s.        |
| <b>IVS (mm)</b>                   | 2.20 $\pm$ 0.04                   | 2.09 $\pm$ 0.04            | 2.74 $\pm$ 0.07 <sup>***</sup>     | 2.36 $\pm$ 0.07 <sup>***, +</sup> | 2.99 $\pm$ 0.05 <sup>***</sup>      | 2.69 $\pm$ 0.09 <sup>***, +</sup> | <0.001                                    | <0.001    | 0.043       |
| <b>PW (mm)</b>                    | 2.38 $\pm$ 0.06                   | 2.25 $\pm$ 0.07            | 2.73 $\pm$ 0.08 <sup>***</sup>     | 2.42 $\pm$ 0.08 <sup>*</sup>      | 3.12 $\pm$ 0.13 <sup>***</sup>      | 2.65 $\pm$ 0.07 <sup>***, +</sup> | <0.001                                    | 0.003     | 0.048       |
| <b>LVEDD (mm)</b>                 | 7.10 $\pm$ 0.1                    | 7.14 $\pm$ 0.1             | 7.30 $\pm$ 0.15                    | 7.33 $\pm$ 0.11                   | 7.26 $\pm$ 0.19                     | 7.39 $\pm$ 0.13                   | 0.035                                     | n.s.      | n.s.        |
| <b>LVESD (mm)</b>                 | 3.08 $\pm$ 0.09                   | 3.33 $\pm$ 0.14            | 3.51 $\pm$ 0.11 <sup>***</sup>     | 3.60 $\pm$ 0.13 <sup>+</sup>      | 4.26 $\pm$ 0.16 <sup>***</sup>      | 4.11 $\pm$ 0.21 <sup>***</sup>    | <0.001                                    | n.s.      | n.s.        |
| <b>RWT</b>                        | 2.88 $\pm$ 0.06                   | 2.79 $\pm$ 0.08            | 3.30 $\pm$ 0.08 <sup>***</sup>     | 3.02 $\pm$ 0.07 <sup>***, +</sup> | 3.41 $\pm$ 0.07 <sup>***</sup>      | 3.05 $\pm$ 0.03 <sup>***, +</sup> | <0.001                                    | 0.002     | n.s.        |
| <b>FS (%)</b>                     | 57 $\pm$ 1                        | 54 $\pm$ 2                 | 52 $\pm$ 1 <sup>***</sup>          | 51 $\pm$ 1                        | 42 $\pm$ 1 <sup>***</sup>           | 45 $\pm$ 2 <sup>***</sup>         | <0.001                                    | n.s.      | 0.028       |
| <b>EF (%)</b>                     | 84 $\pm$ 1                        | 83 $\pm$ 1                 | 81 $\pm$ 1                         | 79 $\pm$ 1 <sup>+</sup>           | 73 $\pm$ 1 <sup>***</sup>           | 76 $\pm$ 1 <sup>***</sup>         | <0.001                                    | n.s.      | 0.017       |
| <b>E/E'</b>                       | 22.4 $\pm$ 1.4                    | 24.4 $\pm$ 1.2             | 35.2 $\pm$ 1.6 <sup>***</sup>      | 28.2 $\pm$ 1.1 <sup>***, +</sup>  | 43.9 $\pm$ 1.4 <sup>***</sup>       | 32.9 $\pm$ 1.1 <sup>***, +</sup>  | <0.001                                    | 0.001     | <0.001      |

<sup>§</sup>p-values of two-way ANOVA (mixed-design) including two factors: (i) age (9, 14 and 19 weeks, as repeated measurements) and (ii) treatment (high-salt control vs. high-salt + spermidine, as independent observations).

\*\*\*p<0.001, \*\*p<0.01, \*p<0.05 vs. age-matched control (Simple main effects following significant two-way ANOVA)

+++p<0.001, ++p<0.01, +p<0.05 vs. 9-week-old treatment-matched group (Simple main effects [Bonferroni-corrected] following significant two-way ANOVA)

## Supplementary Table 15:

### Gravimetric analysis of *Dahl* salt-sensitive rats.

Control and spermidine-treated *Dahl* salt-sensitive rats fed a high-salt (8% NaCl) diet starting from the age of 7 weeks (see Fig. 4a for the feeding scheme) were used at the indicated ages. Abbreviations: TL, tibia length. Data show means  $\pm$  s.e.m. of indicated number of rats analyzed per group.

|                                 | 7-week-old<br>(no high-salt)    | 14-week-old<br>(7 weeks high-salt) |                              | 19-week-old<br>(12 weeks high-salt) |                                  | Two-way ANOVA<br>(p-values <sup>§</sup> ) |           |             |
|---------------------------------|---------------------------------|------------------------------------|------------------------------|-------------------------------------|----------------------------------|-------------------------------------------|-----------|-------------|
|                                 | Control<br>(N=10)               | Control<br>(N=9)                   | Spermidine<br>(N=9)          | Control<br>(N=10)                   | Spermidine<br>(N=10)             | Age                                       | Treatment | Interaction |
| <b>Body weight (g)</b>          | 202 $\pm$ 3 <sup>†, ‡</sup>     | 370 $\pm$ 6                        | 351 $\pm$ 7                  | 365 $\pm$ 12                        | 383 $\pm$ 9 <sup>+</sup>         | n.s.                                      | n.s.      | 0.54        |
| <b>Heart weight (HW, mg)</b>    | 889 $\pm$ 18 <sup>†, ‡</sup>    | 1596 $\pm$ 32                      | 1412 $\pm$ 53 <sup>**</sup>  | 1757 $\pm$ 27 <sup>++</sup>         | 1599 $\pm$ 29 <sup>***, +</sup>  | <0.001                                    | <0.001    | n.s.        |
| <b>HW/TL (mg/mm)</b>            | 24.1 $\pm$ 0.5 <sup>†, ‡</sup>  | 39.7 $\pm$ 0.9                     | 35.2 $\pm$ 1.3 <sup>**</sup> | 42.3 $\pm$ 0.7 <sup>+</sup>         | 38.1 $\pm$ 0.6 <sup>***, +</sup> | 0.004                                     | <0.001    | n.s.        |
| <b>Lung weight (mg)</b>         | 1104 $\pm$ 19 <sup>†, ‡</sup>   | 2146 $\pm$ 91                      | 1896 $\pm$ 116 <sup>*</sup>  | 1973 $\pm$ 59                       | 1781 $\pm$ 71                    | n.s.                                      | 0.014     | n.s.        |
| <b>Lung weight/TL (mg/mm)</b>   | 29.9 $\pm$ 0.6 <sup>†, ‡</sup>  | 53.3 $\pm$ 2.3                     | 47.3 $\pm$ 3                 | 47.5 $\pm$ 1.5                      | 42.4 $\pm$ 1.7                   | 0.018                                     | 0.014     | n.s.        |
| <b>Kidney weight (mg)</b>       | 1779 $\pm$ 40 <sup>†, ‡</sup>   | 3626 $\pm$ 142                     | 3195 $\pm$ 69 <sup>*</sup>   | 4386 $\pm$ 172 <sup>+++</sup>       | 3692 $\pm$ 143 <sup>***, +</sup> | <0.001                                    | <0.001    | n.s.        |
| <b>Kidney weight/TL (mg/mm)</b> | 48.1 $\pm$ 1 <sup>†, ‡</sup>    | 90.1 $\pm$ 3.7                     | 79.5 $\pm$ 1.6 <sup>*</sup>  | 105.6 $\pm$ 4.3 <sup>++</sup>       | 87.9 $\pm$ 3.4 <sup>**</sup>     | 0.002                                     | <0.001    | n.s.        |
| <b>Liver weight (g)</b>         | 8.27 $\pm$ 0.36 <sup>†, ‡</sup> | 13.85 $\pm$ 0.32                   | 12.61 $\pm$ 0.74             | 15.89 $\pm$ 0.82 <sup>+</sup>       | 14.11 $\pm$ 0.45 <sup>*</sup>    | n.s.                                      | 0.021     | n.s.        |
| <b>Liver weight/TL (mg/mm)</b>  | 223.7 $\pm$ 9.4 <sup>†, ‡</sup> | 343.9 $\pm$ 8.3                    | 313.9 $\pm$ 17.9             | 383.4 $\pm$ 21.6                    | 336.2 $\pm$ 10.9                 | n.s.                                      | 0.021     | n.s.        |
| <b>Spleen weight (mg)</b>       | 632 $\pm$ 14 <sup>†, ‡</sup>    | 1046 $\pm$ 51                      | 900 $\pm$ 37                 | 1354 $\pm$ 98 <sup>++</sup>         | 1009 $\pm$ 60 <sup>***</sup>     | 0.004                                     | 0.001     | n.s.        |
| <b>Spleen weight/TL (mg/mm)</b> | 17.1 $\pm$ 0.4 <sup>†, ‡</sup>  | 26 $\pm$ 1.3                       | 22.4 $\pm$ 0.9               | 32.6 $\pm$ 2.4 <sup>++</sup>        | 24 $\pm$ 1.4 <sup>**</sup>       | 0.007                                     | 0.013     | 0.05        |

<sup>§</sup>p-values of two-way ANOVA including two factors: (i) age (14 vs. 19 weeks) and (ii) treatment (high-salt control vs. high-salt + spermidine).

<sup>\*\*\*</sup>p<0.001, <sup>\*\*</sup>p<0.01, <sup>\*</sup>p<0.05 vs. age-matched control (simple main effects following significant two-way ANOVA)

<sup>+++</sup>p<0.001, <sup>++</sup>p<0.01, <sup>+</sup>p<0.05 vs. 14-week-old treatment-matched group (simple main effect following significant two-way ANOVA)

<sup>†</sup>p<0.001 and <sup>‡</sup>p<0.001 vs. 14-week-old and 19-week-old controls, respectively (one-way ANOVA comparing all controls with post-hoc Tukey or Welch's test with post-hoc Games-Howell according to equality of variances)

**Supplementary Table 16: Left ventricular hemodynamic parameters of *Dahl* salt-sensitive rats.**

Control and spermidine-treated *Dahl* salt-sensitive rats fed a high-salt (8% NaCl) diet starting from the age of 7 weeks (see Fig. 4a for the feeding scheme) were used at the indicated ages. Abbreviations: BSA, body surface area; CI, cardiac index;  $dP/dt_{max}$ , peak rate of pressure rise;  $dP/dt_{min}$ , peak rate of pressure decay;  $Ea_i$ , arterial elastance for indexed volumes, EF, ejection fraction; ESP, end-systolic pressure; EDP, end-diastolic pressure;  $ESV_i$ , indexed end-systolic volume;  $EDV_i$ , indexed end-diastolic volume;  $P_{max}$ , maximum ventricular pressure;  $SV_i$ , indexed stroke volume; VVC, ventricular-vascular coupling;  $\tau$ , Left-ventricular pressure decay time constant (according to Weiss' method); EDPVR  $\beta_i$ , exponential end-diastolic pressure-volume relationship chamber stiffness constant for indexed volumes; ESPVR  $Ees_i$ , linear end-systolic pressure-volume relationship slope for indexed volumes. Data show means  $\pm$  s.e.m. of indicated number of rats analyzed per group.

|                                                       | 7-week-old<br>(no high-salt)  | 14-week-old<br>(7 weeks high-salt) |                        | 19-week-old<br>(12 weeks high-salt) |                          | Two-way ANOVA <sup>§</sup> |           |             |
|-------------------------------------------------------|-------------------------------|------------------------------------|------------------------|-------------------------------------|--------------------------|----------------------------|-----------|-------------|
|                                                       | Control (N=10)                | Control (N=9)                      | Spermidine (N=9)       | Control (N=10)                      | Spermidine (N=10)        | Age                        | Treatment | Interaction |
| <b>BSA (cm<sup>2</sup>)</b>                           | 314±3 <sup>†††. †††</sup>     | 469±5                              | 453±6                  | 464±11                              | 480±7 <sup>†</sup>       | n.s.                       | n.s.      | 0.052       |
| <b>HR (bpm)</b>                                       | 429±8                         | 419±12                             | 421±11                 | 410±8                               | 403±10                   | n.s.                       | n.s.      | n.s.        |
| <b>EF (%)</b>                                         | 85±1 <sup>†. †††</sup>        | 81±1                               | 80±2                   | 70±1 <sup>†††</sup>                 | 72±2 <sup>††</sup>       | <0.001                     | n.s.      | n.s.        |
| <b>CI (μl/min.cm<sup>2</sup>)</b>                     | 298±16 <sup>†††. †††</sup>    | 207±8                              | 211±4                  | 167±8 <sup>†††</sup>                | 178±7 <sup>††</sup>      | <0.001                     | n.s.      | n.s.        |
| <b>SV<sub>i</sub> (μl/cm<sup>2</sup>)</b>             | 0.70±0.04 <sup>†††. †††</sup> | 0.49±0.02                          | 0.5±0.01               | 0.41±0.02 <sup>†††</sup>            | 0.44±0.02 <sup>†</sup>   | <0.001                     | n.s.      | n.s.        |
| <b>ESV<sub>i</sub> (μl/cm<sup>2</sup>)</b>            | 0.12±0.01 <sup>††</sup>       | 0.11±0.01                          | 0.13±0.01              | 0.18±0.01 <sup>††</sup>             | 0.17±0.02 <sup>†</sup>   | <0.001                     | n.s.      | n.s.        |
| <b>EDV<sub>i</sub> (μl/cm<sup>2</sup>)</b>            | 0.82±0.05 <sup>†††. †††</sup> | 0.61±0.03                          | 0.63±0.02              | 0.59±0.03                           | 0.62±0.02                | n.s.                       | n.s.      | n.s.        |
| <b>P<sub>max</sub> (mmHg)</b>                         | 112±4 <sup>†††. †††</sup>     | 136±4                              | 123±4 <sup>*</sup>     | 151±5 <sup>††</sup>                 | 145±3 <sup>†††</sup>     | <0.001                     | 0.012     | n.s.        |
| <b>ESP (mmHg)</b>                                     | 99±5 <sup>†††</sup>           | 116±5                              | 106±4                  | 132±6 <sup>†</sup>                  | 130±3 <sup>†††</sup>     | <0.001                     | n.s.      | n.s.        |
| <b>EDP (mmHg)</b>                                     | 7±0.7 <sup>†. ††</sup>        | 10±0.4                             | 8.7±0.3                | 10.6±1                              | 7.8±0.5 <sup>**</sup>    | n.s.                       | 0.005     | n.s.        |
| <b>Ea<sub>i</sub> (mmHg*cm<sup>2</sup>/μl)</b>        | 147±11 <sup>†††. †††</sup>    | 236±9                              | 212±8                  | 331±21 <sup>†††</sup>               | 298±15 <sup>†††</sup>    | <0.001                     | 0.042     | n.s.        |
| <b>dP/dt<sub>max</sub> (mmHg/s)</b>                   | 6840±358                      | 6711±282                           | 6409±169               | 7475±234 <sup>†</sup>               | 7314±260 <sup>†</sup>    | 0.001                      | n.s.      | n.s.        |
| <b>dP/dt<sub>min</sub> (mmHg/s)</b>                   | -6966±377 <sup>†</sup>        | -5960±393                          | -5560±319              | -6948±306 <sup>††</sup>             | -6703±208 <sup>††</sup>  | <0.001                     | n.s.      | n.s.        |
| <b>τ (ms)</b>                                         | 7.7±0.2 <sup>††. †</sup>      | 9±0.3                              | 8.7±0.3                | 8.7±0.3                             | 8.3±0.3                  | n.s.                       | n.s.      | n.s.        |
| <b>VVC</b>                                            | 1.15±0.18                     | 1.07±0.08                          | 1.28±0.14              | 0.99±0.15                           | 1.35±0.14                | n.s.                       | 0.043     | n.s.        |
| <b>ESPVR Ees<sub>i</sub> (mmHg*cm<sup>2</sup>/μl)</b> | 162±22 <sup>††. ††</sup>      | 254±24                             | 269±31                 | 317±48                              | 393±33 <sup>†</sup>      | 0.016                      | n.s.      | n.s.        |
| <b>EDPVR β<sub>i</sub> (μl/cm<sup>2</sup>)</b>        | 1.31±0.16 <sup>†††. †††</sup> | 1.83±0.24                          | 1.45±0.14 <sup>*</sup> | 2.85±0.42                           | 1.93±0.26 <sup>†††</sup> | n.s.                       | <0.001    | n.s.        |

<sup>§</sup>p-values of two-way ANOVA including two factors: (i) age (14 vs. 19 weeks) and (ii) treatment (high-salt vs. high-salt + spermidine).

<sup>\*\*\*</sup>p<0.001, <sup>\*\*</sup>p<0.01, <sup>\*</sup>p<0.05 vs. age-matched control (simple main effects following significant two-way ANOVA)

<sup>†††</sup>p<0.001, <sup>††</sup>p<0.01, <sup>†</sup>p<0.05 vs. 14-week-old treatment-matched group (simple main effect following significant two-way ANOVA)

<sup>†††</sup>p<0.001, <sup>††</sup>p<0.01, <sup>†</sup>p<0.05 vs. 14-week-old control and <sup>†††</sup>p<0.001, <sup>††</sup>p<0.01, <sup>†</sup>p<0.05 vs. 19-week-old control (one-way ANOVA comparing all controls with post-hoc Tukey or Welch's test with post-hoc Games-Howell according to equality of variances)

Note: for ESPVR  $Ees_i$  and EDPVR  $\beta_i$ , other parameters in the fitting equation ( $V_0$  and  $\alpha$ , respectively) were included as covariates using ANCOVA.

## Supplementary Notes

### Information on human data analysis

**Study subjects.** The Bruneck Study is a prospective, population-based survey on the epidemiology and pathogenesis of atherosclerosis and cardiovascular disease<sup>47,91–93</sup>. At baseline in 1990 the study population comprised an age- and sex-stratified random sample of all inhabitants of Bruneck (125 men and 125 women from each of the fifth through eighth decades of age, all of Western European descent; 93.4% participated). In 1995, 826 subjects participated in the first quinquennial re-examination. During follow-up from 1995 to 2010, detailed information on fatal heart failure was carefully collected for all of these 826 subjects (follow-up rate, 100%). Population mobility in Bruneck is very low (<1% per year) and virtually all inhabitants are referred to one local hospital that closely works together with the general practitioners, which allows retrieval of full medical information. In 2010, 484 subjects were still alive and participated in the 4<sup>th</sup> re-evaluation. The study protocol was approved by the ethics committees of Bolzano and Verona and conforms to the Declaration of Helsinki. All study subjects provided written informed consent. Risk factors were assessed by means of validated standard procedures as described previously<sup>47,91–93</sup>.

**Quantification of nutritional intakes.** Long-term average dietary intakes were ascertained in 1995, 2000, and 2005 by a dietitian-administered 118-item food frequency questionnaire (FFQ). This questionnaire was based on the gold standard FFQ by Willett and Stampfer<sup>53</sup> and modified to better fit the dietary peculiarities in the survey area. For each item in the FFQ a common unit or portion size was specified and participants declared their average intake by choosing one of nine response categories ranging from 'never' to 'six or more times a day'. Dietitians made use of illustrative photos of food items when exploring aphasic patients and of information provided by spouses, care-givers and nursing homes when dealing with demented and institutionalized subjects. An open-ended section inquired about foods not listed in the FFQ that were consumed at least once a week. Complex foods were dissected into component foods according to common recipes. Intakes of nutrients were calculated as weighted sums of food intakes using the United States Department of Agriculture nutrient database, release 23 (*U.S. Department of Agriculture, Agricultural Research Service. 2010. USDA National Nutrient Database for Standard Reference, Release 23. Nutrient Data Laboratory Home Page, <http://www.ars.usda.gov/ba/bhnrc/ndl>*). Special nutrient data were compiled for various supplements and for polyamines (see Nutrient Database Table below), also integrating a published database<sup>94</sup>. The FFQ was validated using full diet records over 7 to 9 days in 124 representative unselected subjects. Validity was high and similar to that previously reported for the same FFQ in other populations<sup>83</sup>. As expected and shown previously, dietary patterns were highly stable over time, corroborating that surveyed intakes are representative of average long-term intakes. This also applied to polyamine intakes with average correlation coefficients between successive assessments of spermidine, spermine, and putrescine of 0.54, 0.43, and 0.44, respectively. Overall, 2540 diet records were collected from 829 individuals who participated in at least one of the dietary assessments in 1995, 2000, 2005 and 2010. Out of this, 815 complete diet records were assessed in 1995 and 484 in 2010.

**Ascertainment of the clinical end points.** Between baseline (1995) and 2010, we collected detailed information on the time, cause, and circumstances of death of all study subjects who died during the follow-up period. Utilizing death certificates, all medical records ever compiled on study subjects, and autopsy reports in the rare event of unexpected death allowed complete ascertainment of deaths and reliable categorization of their causes. Death due to heart failure was defined according to ICD-10 diagnosis codes I50.x, I13.0, I13.2, I11.00, I11.01, and I97.1 (heart failure following cardiac surgery or due to presence of cardiac prosthesis). Clinically overt heart failure was defined according to gold standard Framingham criteria (presence of at least 2 major criteria or 1 major criterion in conjunction with 2 minor criteria)<sup>84</sup> and ascertained as part of the 2010 re-examination of the Bruneck Cohort. Causes of death as well as clinically overt heart failure were categorized by a senior researcher who was unaware of the dietary data.

**Statistical analysis.** Dietary intakes were cumulatively averaged over follow-ups to capture long-term dietary behavior and to reduce within-subject variability: For each follow-up and each subject, intakes assessed at that and all preceding follow-ups were averaged. Polyamine intakes were log-transformed and adjusted for total caloric intake by using the residual method<sup>86</sup> in a log-log simple linear model. They were then scaled to unit variance such that effects were estimated for one-standard deviation increases in intakes. Cumulatively averaged polyamine intake was used for the analyses targeting (a) the plasma proteome (2000) (b) overt heart failure (2010), and (c) blood pressures levels. Outcome analyses on cardiovascular disease used standard Cox models while outcome analysis on death due to heart failure employed the Fine and Gray proportional sub-distribution hazards model<sup>95</sup>, accounting for the competing risk of death due to causes other than heart failure. Both time to event analyses (i.e. incident CVD and death due to heart failure) focused on the 15-year follow-up between 1995 and 2010 and used baseline (1995) polyamine intake as the exposure. Cross-sectional (2010) analysis on clinically overt heart failure employed unstratified logistic regression. Results on heart failure are presented without adjustment and with adjustment for age, sex, total caloric intake, current smoking, diabetes, alcohol consumption, and diastolic blood pressure (multivariable model). Analyses on blood pressure employed cumulatively averaged polyamine intakes from all four follow-ups in linear mixed models adjusting for age, age squared, sex, and total caloric intake. Multivariable adjustment (see above) resulted in very similar results (data not shown). Normality of residuals was investigated using normal quantile-quantile plots and deemed appropriate. The numbers of unique subjects and of diet records used for this analysis were 829 and 2540. All P values are two-sided and an alpha level of 0.05 is used throughout. Analyses were conducted with R 3.1.1.

**Study characteristics:** Participants were evaluated regarding their medical history, life-style behaviors, and vascular risk factors using standardized questionnaires and interviews. Individuals were coded as current smokers or non-smokers (including former smokers). Alcohol intake was quantified in grams per day. Systolic and diastolic blood pressures were taken after the participant had been sitting for at least 10 minutes and the mean of three independent measurements was calculated. Hypertension was defined as the presence of a systolic blood pressure  $\geq 140$  mmHg or a diastolic blood pressure  $\geq 90$  mmHg, or the use of antihypertensive drugs. Blood samples were taken in the morning hours after an overnight fast and 12 hours of abstinence from smoking and immediately processed or stored at  $-70$  °C. *Diabetes mellitus* was diagnosed when fasting plasma glucose exceeded 126 mg/dl or when participants were under anti-diabetic medication.

**Dietary Sources of Spermidine Intake in the Bruneck Cohort:** Calculations are based on data obtained from 2540 food frequency questionnaires.

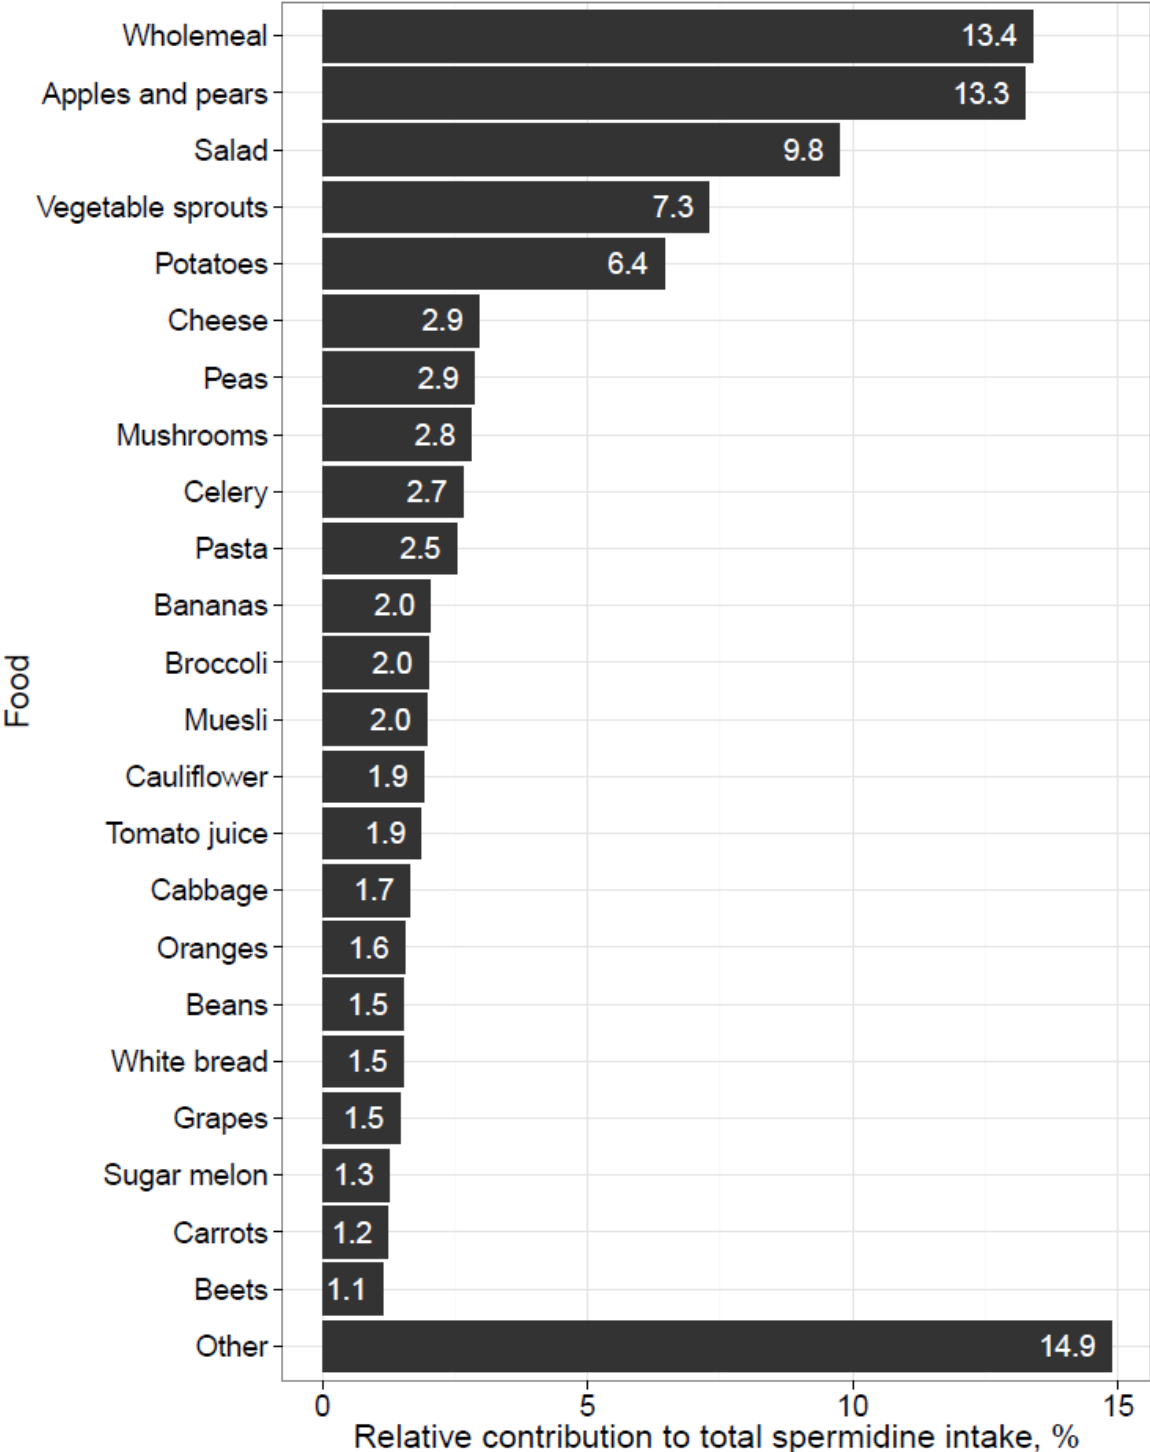

| Nutrient Database for Polyamine Intake (in nmol/g). |            |          |            |              |           |
|-----------------------------------------------------|------------|----------|------------|--------------|-----------|
| Food Category                                       | Spermidine | Spermine | Putrescine | Data points* | Reference |
| <b>1. Milk and Dairy products</b>                   |            |          |            |              |           |
| Full cream milk                                     | 2          | 2        | 0          | 3            | 96        |
| Skim milk                                           | 3          | 1        | 2          | 1            | 96        |
| Yoghurt                                             | 2          | 1        | 1          | 3            | 97        |
| Curd                                                | 0          | 0        | 0          | 1            | 97        |
| Cheese <sup>†</sup>                                 | 113        | 23       | 876        | 19           | 96–98     |
| <b>2. Fruits</b>                                    |            |          |            |              |           |
| Grapes                                              | 87         | 0        | 106        | 1            | 97        |
| Apples                                              | 193        | 71       | 144        | 2            | 96        |
| Peaches or apricots                                 | 42         | 25       | 4          | 1            | 97        |
| Oranges                                             | 35         | 2        | 1302       | 4            | 98        |
| Citrons                                             | 34         | 9        | 466        | 1            | 97        |
| Water melon                                         | 8          | 0        | 0          | 1            | 97        |
| Sugar melon                                         | 81         | 0        | 5          | 1            | 97        |
| Strawberries                                        | 41         | 0        | 11         | 1            | 97        |
| Blackberries                                        | 35         | 0        | 11         | 1            | 97        |
| Prune (dried)                                       | 11         | 0        | 12         | 1            | 97        |
| Pineapple                                           | 30         | 0        | 46         | 1            | 97        |
| Mango                                               | 198        | 16       | 903        | 1            | 97        |
| Cherry                                              | 19         | 0        | 53         | 1            | 97        |
| Banana                                              | 60         | 0        | 323        | 1            | 97        |
| <b>3. Vegetables</b>                                |            |          |            |              |           |
| Tomato                                              | 20         | 1        | 347        | 4            | 98        |
| Tomato sauce                                        | 58         | 0        | 294        | 1            | 96        |
| Cucumber                                            | 44         | 3        | 75         | 3            | 98        |
| Salad                                               | 150        | 23       | 85         | 9            | 97,98     |
| Cabbage                                             | 82         | 8        | 86         | 1            | 96        |
| Broccoli                                            | 309        | 46       | 113        | 3            | 96        |
| Cauliflower                                         | 207        | 30       | 49         | 5            | 96        |
| Carrots                                             | 46         | 2        | 56         | 7            | 99        |
| Turnips                                             | 92         | 0        | 27         | 1            | 97        |
| Peas                                                | 449        | 260      | 64         | 1            | 96        |
| Kidney beans                                        | 134        | 120      | 4          | 1            | 96        |
| Lentils                                             | 60         | 0        | 65         | 1            | 99        |
| Spinach, uncooked                                   | 185        | 18       | 50         | 1            | 97        |
| Spinach, cooked                                     | 50         | 11       | 146        | 1            | 96        |
| Celeriac                                            | 184        | n.d.     | 69         | 1            | 96        |
| Garlic                                              | 181        | 20       | 21         | 2            | 97        |
| Mushrooms                                           | 651        | 0        | 119        | 8            | 97        |
| Wheat germs                                         | 2440       | 721      | 706        | 1            | 97        |
| <b>4. Protein</b>                                   |            |          |            |              |           |
| Eggs                                                | 0          | 1        | 2          | 2            | 96        |
| Poultry                                             | 37         | 314      | 12         | 4            | 96        |

|                                         |      |                             |     |   |           |
|-----------------------------------------|------|-----------------------------|-----|---|-----------|
| Beef or veal                            | 45   | 157                         | 78  | 5 | 98        |
| Pork                                    | 22   | 185                         | 15  | 4 | 98        |
| Game                                    | 106  | 287                         | 251 | 3 | 96        |
| Lamb, mutton and fawn-meat              | 34   | 233                         | 11  | 1 | 97        |
| Sausages (mortadella, wiener, chorizo)  | 28   | 106                         | 585 | 4 | 96,98     |
| Smoked ham                              | 17   | 224                         | 47  | 1 | 96        |
| Innards (chicken, pork, beef)           | 240  | 606                         | 96  | 9 | 97,99,100 |
| Tuna                                    | 23   | 39                          | 23  | 2 | 96        |
| Freshwater fish                         | 54   | 65                          | 8   | 1 | 96        |
| Saltwater fish                          | 25   | 26                          | 119 | 9 | 96-98     |
| Soybean                                 | 854  | 192                         | 332 | 4 | 96,97     |
| Nuts                                    | 252  | 110                         | 90  | 6 | 97        |
| <b>5. Sweets</b>                        |      |                             |     |   |           |
| Chocolate                               | n.d. |                             |     |   |           |
| Confection of pastry                    | n.d. |                             |     |   |           |
| Ice                                     | n.d. |                             |     |   |           |
| Goodies and candies                     | n.d. |                             |     |   |           |
| Honey                                   | 0    | 0                           | 0   | 1 | 97        |
| Cookies                                 | n.d. |                             |     |   |           |
| <b>6. Carbohydrate</b>                  |      |                             |     |   |           |
| White bread                             | 35   | 18                          | 19  | 1 | 96        |
| Whole-grain bread                       | 129  | 36                          | 24  | 2 | 98        |
| Noodles                                 | 49   | 58                          | 12  | 1 | 96        |
| Dumplings                               | n.d. |                             |     |   |           |
| Cereals mixed                           | 167  | 32                          | 24  | 1 | 96        |
| Potatoes                                | 96   | 9                           | 118 | 4 | 96        |
| Rice                                    | 16   | 15                          | 9   | 3 | 96,97     |
| Polenta                                 | 297  | 6                           | 520 | 1 | 97        |
| Omelet                                  | 64   | 17                          | 28  | 1 |           |
| Pizza dough <sup>‡</sup>                |      | Similar to white bread data |     |   |           |
| Chips                                   | 171  | 13                          | 245 | 1 | 96        |
| Potato chips                            | 259  | 23                          | 455 | 1 | 96        |
| <b>7. Butter, Oils and Cooking Fats</b> |      |                             |     |   |           |
| Butter                                  | n.d. |                             |     |   |           |
| Lard                                    | n.d. |                             |     |   |           |
| Margarine                               | n.d. |                             |     |   |           |
| Olive oil                               | n.d. |                             |     |   |           |
| Seed oil                                | n.d. |                             |     |   |           |
| Mayonnaise                              | n.d. |                             |     |   |           |
| <b>8. Drinks</b>                        |      |                             |     |   |           |
| Cola                                    | 0    | 0                           | 0   | 1 | 97        |
| Lemonade                                | n.d. |                             |     |   |           |
| Apple juice                             | n.d. |                             |     |   |           |
| Lemon juice                             | n.d. |                             |     |   |           |
| Orange juice                            | 13   | 0                           | 621 | 1 | 98        |
| Mineral water                           | 0    | 0                           | 0   | 1 |           |



|                  |    |    |     |   |    |
|------------------|----|----|-----|---|----|
| Red wine         | 2  | 0  | 83  | 4 | 98 |
| White wine       | 0  | 0  | 44  | 2 | 97 |
| Beer             | 3  | 0  | 189 | 3 | 97 |
| Liquor, Schnapps | 0  | 0  | 0   | 2 | 97 |
| Coffee           | 0  | 0  | 1   | 1 | 96 |
| Black tea        | 4  | 6  | 3   | 2 | 96 |
| Green tea        | 23 | 19 | 18  | 1 | 97 |
| Tea, general     | 1  | 0  | 0   | 1 | 96 |

\*The table integrates published data from previous publications as indicated. Polyamine contents of similar types of food that matched the same FFQ food categories (manually curated) were grouped by using the mean or median of the group (the number of independent data points from matching food items is indicated). Zero values refer to polyamine contents below detection limit. Values are means except for mushrooms and nuts for which medians were used due to high variations within the available published data.

† 19 sorts of cheese excluding Cheddar.

‡ Replaced as indicated.

## Supplementary References

89. *International Classification of Rodent Tumors. The Mouse.* (Mohr, Ulrich (Ed.), Springer Berlin Heidelberg, 2001).
90. Mi, H., Muruganujan, A. & Thomas, P. D. PANTHER in 2013: modeling the evolution of gene function, and other gene attributes, in the context of phylogenetic trees. *Nucleic Acids Res.* **41**, D377-386 (2013).
91. Kiechl, S. *et al.* Toll-like receptor 4 polymorphisms and atherogenesis. *N. Engl. J. Med.* **347**, 185–192 (2002).
92. Kiechl, S. *et al.* Blockade of receptor activator of nuclear factor- $\kappa$ B (RANKL) signaling improves hepatic insulin resistance and prevents development of diabetes mellitus. *Nat. Med.* **19**, 358–363 (2013).
93. Willeit, K. *et al.* Carotid atherosclerosis and incident atrial fibrillation. *Arterioscler. Thromb. Vasc. Biol.* **33**, 2660–2665 (2013).
94. Zoumas-Morse, C. *et al.* Development of a polyamine database for assessing dietary intake. *J. Am. Diet. Assoc.* **107**, 1024–1027 (2007).
95. Fine, J. P. & Gray, R. J. A Proportional Hazards Model for the Subdistribution of a Competing Risk. *J. Am. Stat. Assoc.* **94**, 496 (1999).
96. Kalač, P. & Krausová, P. A review of dietary polyamines: Formation, implications for growth and health and occurrence in foods. *Food Chem.* **90**, 219–230 (2005).
97. Nishimura, K., Shiina, R., Kashiwagi, K. & Igarashi, K. Decrease in Polyamines with Aging and Their Ingestion from Food and Drink. *J. Biochem. (Tokyo)* **139**, 81–90 (2006).
98. Eliassen, K. A., Reistad, R., Risøen, U. & Rønning, H. F. Dietary polyamines. *Food Chem.* **78**, 273–280 (2002).
99. Kala, P. Contents of polyamines in selected foods. *Food Chem.* **90**, 561–564 (2005).
100. Kalač, P. Recent advances in the research on biological roles of dietary polyamines in man. *J Appl Biomed* **7**, 65–74 (2009).
